# Supplementary material for: The first organocatalytic asymmetric synthesis of 3-substituted isoindolinones
Source: Royal Society of Chemistry journal article supplement (doi:10.1039/c2ra20231j), 2012-01-01
Supplement: c2ra20231j.pdf [file c2ra20231j.pdf]

## The First organocatalytic asymmetric synthesis of 3-substituted isoindolinones.

Vijaykumar More,<sup>a</sup> Renate Rohlmann,<sup>b</sup> Olga García Mancheño,<sup>b\*</sup> Carmen Petronzi,<sup>a</sup> Laura Palombi,<sup>a</sup> Antonio De Rosa<sup>a</sup> Antonia Di Mola<sup>c</sup> and Antonio Massa<sup>a\*</sup>

<sup>a</sup> *Dipartimento di Chimica e Biologia, Università di Salerno, Via Ponte Don Melillo 84084 – Fisciano (SA) Italy*

<sup>b</sup> *Institute of Organic Chemistry, Münster University, 48149 Münster, Germany.*

<sup>c</sup> *Dipartimento di Scienze Farmaceutiche e Biomediche, Università di Salerno, Italy*

E-mail: [amassa@unisa.it](mailto:amassa@unisa.it)

|                                                                                                                 |       |
|-----------------------------------------------------------------------------------------------------------------|-------|
| General remarks.....                                                                                            | 2     |
| General reaction and crystallization procedures .....                                                           | 2     |
| Preliminary data of reactions performed with cinchona alkaloids.....                                            | 2-3   |
| Spectroscopic data of new compounds.....                                                                        | 3-6   |
| Procedures for preparation of aldehydes <b>1b</b> , <b>1c</b> and <b>1d</b> , and their spectroscopic data..... | 6-8   |
| References.....                                                                                                 | 8     |
| Copies of <sup>1</sup> H and <sup>13</sup> C NMR Spectra of isoindolinones <b>3</b> .....                       | 9-19  |
| Copies of <sup>1</sup> H and <sup>13</sup> C NMR Spectra of aldehydes <b>1b</b> , <b>1c</b> and <b>1d</b> ..... | 20-23 |
| Copies of HPLC chromatograms of racemic and enantioenriched isoindolinones.....                                 | 24-38 |

**General remarks.** All reactions were performed using commercially available compounds without further purification. Organocatalysts were synthesized according to known procedures.<sup>1,2</sup> 2-Cyanobenzaldehydes **1b**, **1c** and **1d** were prepared following literature procedures.<sup>3-6</sup> Column chromatographic purification of products was carried out using silica gel 60 (70–230 mesh, Merck). The NMR spectra were recorded on Bruker DRX 400, 300, 250 spectrometers (400 MHz, 300MHz, 250MHz, <sup>1</sup>H; 100 MHz, 75MHz, 62,5MHz <sup>13</sup>C) and Varian AV-300 or AV-400 MHz. Spectra were referenced to residual CHCl<sub>3</sub> (7.26 ppm, <sup>1</sup>H, 77.23 ppm, <sup>13</sup>C). Coupling constants *J* are reported in Hz. Yields are given for isolated products showing one spot on a TLC plate and no impurities detectable in the NMR spectrum. E.e.s were determined with chiral HPLC analysis were performed with Waters dual λ 2478 model employing chiral columns. Mass spectral analyses were carried out using an electrospray spectrometer, Waters 4 micro quadrupole. Exact masses (HRMS) were recorded on a Bruker Daltonics MicroTof spectrometer (samples in CH<sub>3</sub>OH as solvent). Elemental analyses were performed with FLASH EA 1112 series-Thermo Scientific for CHNS-O apparatus

**Typical experimental procedure for enantioselective synthesis of 3-substituted isoindolinones 3.** In a round-bottom flask, aldehyde **1** (0.2 mmol) was added to a solution of malonate esters **2** (1.2 eq, 0.24 mmol) and catalyst (5% mol) in dichloromethane (1.0 or 4.0 mL). The reaction was monitored by TLC and after the reported reaction time, the mixture was poured directly on chromatographic column and purified with 1/1 mixture of hexane / AcOEt to afford the pure products **3**.

**Typical experimental procedures for crystallization of 3.** The title compound (20 mg) was dissolved at room temperature in DCM (0.3 mL) and hexane (0.2 mL) and the solution was left at -18°C for **3a**, at 4°C overnight for **3f**, or by slow diffusion overnight of pentane into a solution of **3b** and **3c** in DCM at room temperature. Then the solution was separated from the solid and evaporated under reduced pressure. The resulting solid was characterised and analysed by chiral HPLC.

### Preliminary experiments in the presence of quinine derivatives.

**Table 1:** **3a** synthesis in preliminary experiments in the presence of 0.1 eq. of quinine

| Entry          | solvent | Time (h) | T °C  | Yield <sup>a</sup> | e.e. <sup>b</sup> |
|----------------|---------|----------|-------|--------------------|-------------------|
| 1              | DCM     | 8        | r.t   | 96                 | 10                |
| 2              | DCM     | 24       | -20   | 90                 | 10                |
| 3              | DCM     | 5 days   | -60°C | 42                 | 0                 |
| 4 <sup>c</sup> | DCM     | 48       | r.t.  | 80                 | 8                 |
| 5              | toluene | 18       | r.t.  | 96                 | 0                 |
| 6              | DMSO    | 18       | r.t   | 0                  | --                |
| 7              | DMF     | 18       | r.t   | 0                  | --                |
| 8              | THF     | 24       | r.t   | 32                 | 0                 |
| 9              | MeOH    | 8        | r.t   | 85                 | 10                |

<sup>a</sup> Yields refer to chromatographically pure compounds

<sup>b</sup> Determined by chiral HPLC

<sup>c</sup> Reaction performed on 0.2 mmol scale of 2-cyanobenzaldehyde at 0.04 M instead of 0.2 M for all the other experiments.

**Table 2:** **3a** synthesis in preliminary experiments in the presence of 0.1 eq. of other cinchona alkaloids in DCM.

| Entry | solvent      | Time (h) | T °C | Yield <sup>a</sup> | e.e. <sup>b</sup> |
|-------|--------------|----------|------|--------------------|-------------------|
| 1     | cupreidine   | 24       | r.t  | 95                 | -10               |
| 2     | cupreidine   | 24       | -20  | 97                 | -10               |
| 3     | quinidine    | 5        | r.t  | 83                 | -10               |
| 4     | cinchonine   | 24       | r.t. | 85                 | -5                |
| 5     | cinchonidine | 24       | r.t. | 95                 | +5                |

<sup>a</sup> Yields refer to chromatographically pure compounds

<sup>b</sup> Determined by chiral HPLC

### Spectroscopic and analytical data of isoindolinones 3.

#### (3a) Dimethyl 2-(1-oxoisoindolin-3-yl)malonate:

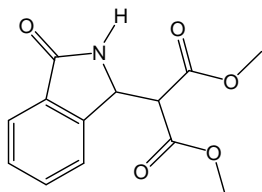

Chromatography: pentane/ethyl acetate 1:1; white solid, yield: 80% (105 mg, 0.5 mmol scale), 81:19 (62% ee), 36 h @ 55 °C == Recryst from DCM/hexane: 58.5 mg, 56%; solution 99.5:0.5 (99% ee),  $[\alpha]_D = -74$  (*c* 0.2, CHCl<sub>3</sub>). This compound was characterised comparing the spectroscopic data with those reported in ref 7. HPLC: Chiralpack AD-H, Pentane:*i*-PrOH 70:30, F = 1.0 mL/min,  $\lambda = 230$  nm,  $t_{R}$  minor = 10.7 min,  $t_{R}$  major = 16.6 min., or

Chiralpack AD, Hexane:*i*-PrOH 80:20, 1.0 mL/min,  $\lambda = 254$  nm,  $t_{R}$  minor = 19.7 min,  $t_{R}$  major = 29.8 min

#### (3b) Diethyl-2-(1-oxoisoindolin-3-yl)malonate:

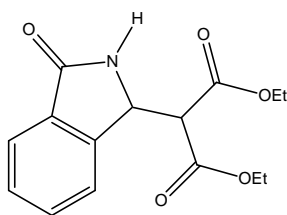

Chromatography: hexane/ethyl acetate 1:1; very viscous oil, yield: 99%, (58 mg, 0.2 mmol scale). <sup>1</sup>H NMR (CDCl<sub>3</sub>: 300 MHz)  $\delta$  7.81 (d, *J*=8.4 Hz, 1H), 7.45 (m, 2 H), 7.35 (d, *J*=8.4 Hz, 1H), 7.20 (s, 1H), 5.16 (d, *J*=8.1 Hz, 1H), 4.27 (q, *J*=8.1 Hz, 2H), 4.07 (q, *J*=8.1 Hz, 2H), 3.64 (d, *J*=8.1 Hz, 1H), 1.25 (t, *J*=8.1 Hz, 3H), 1.08 (t, *J*=8.1 Hz, 3H). <sup>13</sup>C NMR (CDCl<sub>3</sub>: 100 MHz)  $\delta$  171.3, 168.6, 167.8, 145.0, 133.4, 133.2, 130.1, 125.2, 124.3, 63.4,

63.3, 57.2, 56.1, 15.2, 15.0. IR (KBr): 3247, 2985, 2911, 2854, 1721, 1676, 1481, 1349, 1200, 1086, 1007, 695. MS (ESI): *m/z* = 292 (M + H<sup>+</sup>). Anal. Calcd for C<sub>15</sub>H<sub>17</sub>NO<sub>5</sub>: C, 61.85; H, 5.88; N, 4.81. Found: C, 61.75; H, 5.80; N, 4.93.

HPLC: Chiralpack AD column, 80/20 hexane/ *i*PrOH, 0.8 mL/min ( $t_{\text{minor}} = 17.16$ ,  $t_{\text{major}} = 20.38$ ).  $[\alpha]_D = -38$  (*c* 1.0, CHCl<sub>3</sub>)

#### (3c) Di-iso propyl 2-(1-oxoisoindolin-3-yl)malonate:

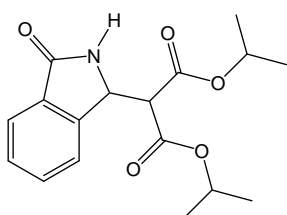

Chromatography: hexane/ethyl acetate 1:1; very viscous oil, yield: 98%, (63 mg, 0.2 mmol scale). <sup>1</sup>H NMR (CDCl<sub>3</sub>: 400 MHz)  $\delta$  7.81 (d7.52, *J*=8.0 Hz, 1H), -7.44 (m, 2 H), 7.38 (d, *J*=8.0 Hz, 1H), 7.05 (s, 1H), 5.14-5.11 (m, 2H), 4.93-4.88 (m, 1H), 3.60 (d, *J* = 4.0 Hz, 1H), 1.25-1.21 (m, 6H), 1.09-1.05 (m, 6H). <sup>13</sup>C NMR (CDCl<sub>3</sub>: 100 MHz)  $\delta$  171.2, 168.2, 167.3, 145.1, 133.3, 133.1, 130.1, 125.1, 124.3, 71.2, 71.1, 57.4, 56.0, 22.8, 22.7,

22.6, 22.5. IR (KBr): 3237, 2982, 2925, 2854, 1731, 1676, 1470, 1359, 1308, 1204, 1096, 1017, 751, 695. MS (ESI):  $m/z = 320$  ( $M + H^+$ ). Anal. Calcd for  $C_{17}H_{21}NO_5$ : C, 63.94; H, 6.63; N, 4.39. Found: C, 63.84; H, 6.85; N, 4.27. HPLC: Chiralpack AD-H column, 95/5 hexane/ *i*PrOH, 0.8 mL/min. 81% e.e ( $t_{major} = 75.10$ ,  $t_{minor} = 79.79$ ).  $[\alpha]_D = -56$  ( $c$  1.0,  $CHCl_3$ )

**(3d) Di-tert-butyl 2-(1-oxoisindolin-3-yl)malonate:**

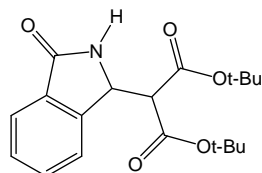

Chromatography: hexane/ethyl acetate 1:1; very viscous oil, yield: 87%, (60 mg, 0.2 mmol scale).  $^1H$  NMR ( $CDCl_3$ : 300 MHz)  $\delta$  7.84 (d,  $J=8.0$  Hz, 1H), 7.56-7.46 (m, 2 H), 7.43 (d,  $J=8.0$  Hz, 1H), 6.82 (s, 1H), 5.08 (d,  $J=8.0$  Hz, 1H), 3.52 (d,  $J=4.0$  Hz, 1H), 1.50 (s, 9H), 1.29 (s, 9H).  $^{13}C$  NMR ( $CDCl_3$ : 100 MHz)  $\delta$  169.8, 166.7, 165.6, 144.0, 132.1, 131.1, 128.6, 123.7, 123.1, 82.9, 82.7, 57.5, 54.7, 27.7, 27.5. IR (KBr): 3220, 2972, 2854, 1705, 1618, 1470, 1359, 1308, 1204, 1096, 1017, 751, 695. MS (ESI):  $m/z = 348$  ( $M + H^+$ ). Anal. Calcd for  $C_{19}H_{25}NO_5$ : C, 65.69; H, 7.25; N, 4.03. Found: C, 65.61; H, 7.18; N, 4.09. HPLC separation. Chiralpack AD-H column, 9/1 hexane/ *i*PrOH, 0.6 mL/min. ( $t_{minor} = 25.22$ ,  $t_{major} = 29.1$ ).  $[\alpha]_D = -34$  ( $c$  1.0,  $CHCl_3$ )

**(3e) Di-benzyl 2-(1-oxoisindolin-3-yl)malonate:**

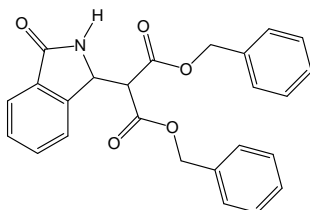

Chromatography: hexane/ethyl acetate 1:1; white solid, yield= (77 mg) 92 % yield: 92%, (77 mg, 0.2 mmol scale). m.p.=122-126°C. Recrystallization from DCM/Hexane, 37 mg (from 77 mg), 45%; solution 0.5:99.5 (>99% ee),  $^1H$  NMR ( $CDCl_3$ : 300 MHz)  $\delta$  7.80 (d,  $J=6.0$  Hz, 1H), 7.45-7.39 (m, 2 H), 7.36-7.30 (m, 6H), 7.26-7.15 (m, 3H), 6.83 (s, 1H), 5.26 (s, 2H), 5.18 (d,  $J=9.0$  Hz, 1H), 5.07 (s, 2H), 3.71 (d,  $J=9.0$  Hz, 1H).  $^{13}C$  NMR ( $CDCl_3$ : 100 MHz)  $\delta$  170.8, 168.3, 167.6, 144.9, 136.1, 136.0, 133.3, 133.1, 130.1, 129.8, 129.8, 129.7, 129.6, 129.4, 125.0, 124.2, 69.1, 68.9, 57.2, 56.0. IR (KBr): 3200, 2982, 2854, 1720, 1662, 1475, 1389, 1306, 1224, 1066, 1010, 800, 686. MS (ESI):  $m/z = 416$  ( $M + H^+$ ). Anal. Calcd for  $C_{25}H_{21}NO_5$ : C, 72.28; H, 5.10; N, 3.37. Found: C, 72.37; H, 5.03; N, 3.30. HPLC separation. Chiralpack AD-H column, 75/25 hexane/ *i*PrOH, 0.5 mL/min. >99% e.e. ( $t_{minor} = 38.35$ ,  $t_{major} = 41.49$ ).  $[\alpha]_D = -23$  ( $c$  1.0,  $CHCl_3$ ).

**(3f) Dimethyl 2-(6-fluoro-3-oxoisindolin-1-yl)malonate:**

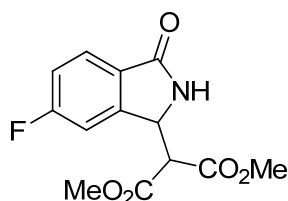

Chromatography: pentane/ethyl acetate 1:1; white solid, yield: 98%, (55 mg, 0.2 mmol scale), 21:79 e.r. (58% ee), 72 h @ 50 °C. Recrystallization from DCM/Pent: 19.1 mg (from 50 mg, 58% ee), 38%; solution 4.5:95.5 (91% ee),  $[\alpha]_D = -60.5$  ( $c$  1.5,  $CHCl_3$ ). M.p. = 174 °C.  $^1H$  NMR (300 MHz,  $DMSO-d_6$ )  $\delta$ : 8.75 (s, 1H), 7.67 (dd,  $J = 8.3, 5.2$  Hz, 1H), 7.38 (dd,  $J = 8.9, 2.3$  Hz, 1H), 7.35 – 7.26 (m, 1H), 5.15 (d,  $J = 4.7$  Hz, 1H), 4.26 (d,  $J = 4.7$  Hz, 1H), 3.65 (s, 3H), 3.51 (s, 3H);  $^{13}C$  NMR (75 MHz,  $DMSO-d_6$ ):  $\delta$  168.4, 167.2, 166.6, 164.2 (d,  $J = 247.7$  Hz), 147.0 (d,  $J = 10.3$  Hz), 129.1 (d,  $J = 1.9$  Hz), 125.1 (d,  $J = 10.0$  Hz), 116.2 (d,  $J = 23.5$  Hz), 110.9 (d,  $J = 24.7$  Hz), 54.4 (d,  $J = 2.6$  Hz), 54.2, 52.7, 52.5;  $^{19}F$  NMR (282 MHz,  $DMSO-d_6$ ):  $\delta$  -108.4; IR (ATR)  $\nu_{max}$  3190, 3084, 1746, 1697, 1433, 1264, 1201, 1000, 865  $cm^{-1}$ ; HRMS (ESI): calcd for  $C_{13}H_{12}FNO_5 \cdot Na^+$   $[M+Na]^+$  304.0592; found 304.0601. HPLC: Chiralpack AD-H, Pentane:*i*-PrOH 70:30,  $F = 1.0$  mL/min,  $\lambda = 230$  nm,  $t_R$  minor = 7.9 min,  $t_R$  major = 9.8 min.

Reaction with catalyst **5**: Recrystallization from DCM/Pent: 17 mg (from 48 mg, -43% ee), 36%; solution 90:10 e.r.,  $[\alpha]_D = +55$  (*c* 0.4, CHCl<sub>3</sub>).

**(3g) Dimethyl 2-(5,6-dimethoxy-3-oxoisindolin-1-yl)malonate:**

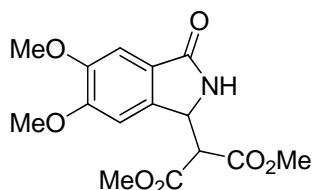

Chromatography: pentane/ethyl acetate 1:2; white solid, yield: 40%, (26 mg, 0.2 mmol scale), 30:70 e.r. (40% ee), 96 h @ 50 °C. Recrystallization from DCM/Pent: 3.5 mg (from 25 mg), 14%; solution 5:95 (90% ee),  $[\alpha]_D = -51$  (*c* 0.2, CHCl<sub>3</sub>). M.p. = 179 °C. <sup>1</sup>H NMR (300 MHz, CDCl<sub>3</sub>): δ 7.29 (s, 1H), 6.87 (s, 1H), 6.79 (s, 1H), 5.09 (d, *J* = 7.9 Hz, 1H), 3.91 (s, 3H), 3.90 (s, 3H), 3.83 (s, 3H), 3.71 (s, 3H), 3.58 (d, *J* = 7.9 Hz, 1H); <sup>13</sup>C NMR (75 MHz, CDCl<sub>3</sub>): δ 170.4, 168, 167.4, 153.0, 150.5, 137.4, 124.4, 105.5, 105.2, 56.3, 56.3, 56.2, 54.6, 53.3, 53.1; IR (ATR)  $\nu_{\max}$  3179, 3072, 2968, 1749, 1688, 1436, 1275, 1068, 871 cm<sup>-1</sup>; HRMS (ESI): calcd for C<sub>19</sub>H<sub>17</sub>NO<sub>2</sub>·Na<sup>+</sup> [M+Na]<sup>+</sup> 346.0897; found 346.0899. HPLC: Chiralpack AD-H, Pentane:*i*-PrOH 70:30, F = 1.0 mL/min, λ = 230 nm, *t*<sub>R</sub> minor = 11.3 min, *t*<sub>R</sub> major = 12.7 min.

**(3h) Dimethyl 2-(7-methyl-3-oxo-2,3-dihydro-1H-pyrrolo[3,4-b]quinolin-1-yl)malonate**

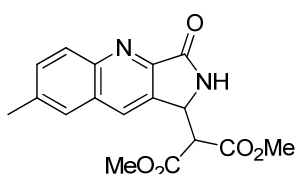

Chromatography: pentane/ethyl acetate 1:2 to ethyl acetate; white solid, yield: 81% (53 mg, 0.2 mmol scale), 71:29 e.r. (42% ee) @ rt, 18 h. Recrystallization from MeCN/MeOH/DCM: 5 mg (from 14 mg, 42% ee), 36%; solution 10:90 e.r. (80% ee),  $[\alpha]_D = -86.5$  (*c* 0.1, CHCl<sub>3</sub>). M.p. = 249 °C. <sup>1</sup>H NMR (300 MHz, CDCl<sub>3</sub>): δ 8.28 (d, *J* = 9.3 Hz, 1H), 8.11 (s, 1H), 7.70 – 7.62 (m, 2H), 7.46 (br s, 1H), 5.37 (d, *J* = 7.8 Hz, 1H), 3.86 (s, 3H), 3.74 (s, 3H), 2.58 (s, 3H); <sup>13</sup>C NMR (75 MHz, CDCl<sub>3</sub>): δ 167.7, 167.6, 167.2, 149.7, 147.9, 139.1, 133.4, 132.7, 131.2, 130.5, 128.8, 127.1, 56.2, 53.5, 53.4, 52.9, 21.9; IR (ATR)  $\nu_{\max}$  3181, 3101, 1721, 1697, 1431, 1322, 1237, 1160, 820 cm<sup>-1</sup>; HRMS (ESI): calcd for C<sub>17</sub>H<sub>16</sub>N<sub>2</sub>O<sub>5</sub>·Na<sup>+</sup> [M+Na]<sup>+</sup> 351.0951; found 351.0954. HPLC: Chiralpack AD-H, Pentane:*i*-PrOH 60:40, F = 0.9 mL/min, λ = 230 nm, *t*<sub>R</sub> minor = 10.7 min, *t*<sub>R</sub> major = 30.1 min.

**(3i) Dimethyl 2-(6-fluoro-3-oxoisindolin-1-yl)malonate**

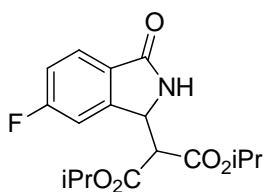

Chromatography: pentane/ethyl acetate 3:1; white solid, yield: 99%, (67 mg, 0.2 mmol scale), 11:89 e.r. (78% ee), 48 h @ 50 °C.  $[\alpha]_D = -53.9$  (*c* 1.7, CHCl<sub>3</sub>). M.p. = 135 °C. <sup>1</sup>H NMR (300 MHz, CDCl<sub>3</sub>): δ 7.82 (dd, *J* = 8.4, 5.1 Hz, 1H), 7.19 (td, *J* = 8.7, 2.2 Hz, 1H), 7.10 (dd, *J* = 8.4, 2.2 Hz, 1H), 6.91 (s, 1H), 5.25 – 5.06 (m, 2H), 4.97 (hept, *J* = 6.3 Hz, 1H), 3.58 (d, *J* = 6.9 Hz, 1H), 1.29 (d, *J* = 2.3 Hz, 3H), 1.27 (d, *J* = 2.2 Hz, 3H), 1.14 (d, *J* = 6.3 Hz, 3H), 1.11 (d, *J* = 6.3 Hz, 3H); <sup>13</sup>C NMR (75 MHz, CDCl<sub>3</sub>): δ 168.9, 167.0, 166.1, 165.4 (d, *J* = 252.2 Hz), 146.5 (d, *J* = 9.9 Hz), 128.4, 126.18 (d, *J* = 9.8 Hz), 116.9 (d, *J* = 23.4 Hz), 110.9 (d, *J* = 24.7 Hz), 70.3, 70.3, 56.4, 54.6 (d, *J* = 2.7 Hz), 21.8, 21.6, 21.6, 21.5; <sup>19</sup>F NMR (282 MHz, CDCl<sub>3</sub>): δ -106.35; IR (ATR)  $\nu_{\max}$  3217, 3090, 2983, 1701, 1237, 1180, 1098 cm<sup>-1</sup>; HRMS (ESI): calcd for C<sub>17</sub>H<sub>20</sub>FO<sub>5</sub>·Na<sup>+</sup> [M+Na]<sup>+</sup> 360.1218; found 360.1214. HPLC: Chiralpack AD-H, Pentane:*i*-PrOH 95:5, F = 0.8 mL/min, λ = 230 nm, *t*<sub>R</sub> minor = 42.0 min, *t*<sub>R</sub> major = 49.3 min.

**(3j) Diisopropyl 2-(5,6-dimethoxy-3-oxoisindolin-1-yl)malonate:**

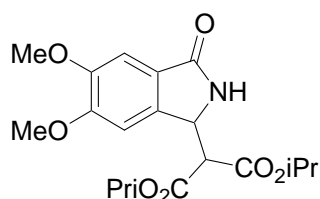

Chromatography: pentane/ethyl acetate 1:1; clear oil, yield: 47%, (36 mg, 0.2 mmol scale), 34:66 e.r. (32% ee), 96 h @ 50 °C.  $[\alpha]_D = -19.9$  (*c* 1.6, CHCl<sub>3</sub>). <sup>1</sup>H NMR (400 MHz, CDCl<sub>3</sub>): δ 7.25 (s, 1H), 6.83 (s, 1H), 6.71 (brs, 1H), 5.12 (hept, *J* = 6.3 Hz, 1H), 5.04 (d, *J* = 7.1 Hz, 1H), 4.95 (hept, *J* = 6.3 Hz, 1H), 3.88 (s, 3H), 3.87 (s, 3H), 3.52 (d, *J* = 7.2 Hz, 1H), 1.26 (d, *J* = 2.0 Hz, 3H), 1.25 (d, *J* = 2.0 Hz, 3H), 1.13 (d, *J* = 5.6 Hz, 3H), 1.11 (d, *J* = 5.6 Hz, 3H); <sup>13</sup>C NMR (101 MHz, CDCl<sub>3</sub>): δ 170.3, 167.2, 166.3, 152.9, 150.4, 137.7, 124.6, 105.4, 105.4, 70.1, 70.1, 56.6, 56.3, 56.3, 54.5, 21.8, 21.6, 21.6, 21.6; IR (ATR)  $\nu_{\max}$  3357, 3219, 2982, 1692, 1286, 1217, 1099, 732 cm<sup>-1</sup>; HRMS (ESI): calcd for C<sub>19</sub>H<sub>25</sub>NO<sub>7</sub>·Na<sup>+</sup> [M+Na]<sup>+</sup> 402.1523; found 402.1516. HPLC: Chiralpack AD-H, Pentane:*i*-PrOH 90:10, F = 1.0 mL/min, λ = 230 nm, *t*<sub>R</sub> minor = 30.4 min, *t*<sub>R</sub> major = 35.0 min.

**(3k) Dimethyl 2-(7-methyl-3-oxo-2,3-dihydro-1H-pyrrolo[3,4-b]quinolin-1-yl)malonate**

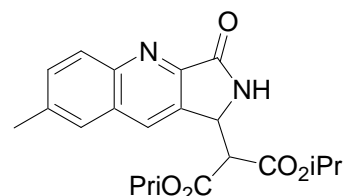

Chromatography: pentane/ethyl acetate 1:1; white solid, yield: 82%, (32 mg, 0.1 mmol scale), 67.2:32.8 e.r. (34% ee), 144 h @ 50 °C.  $[\alpha]_D = -47.6$  (*c* 1.4, CHCl<sub>3</sub>). M.p. = 207 °C. <sup>1</sup>H NMR (400 MHz, CDCl<sub>3</sub>): δ 8.28 (d, *J* = 9.1 Hz, 1H), 8.15 (s, 1H), 7.68 – 7.59 (m, 2H), 7.36 (br s, 1H), 5.34 (d, *J* = 6.8 Hz, 1H), 5.20 (hept, *J* = 6.3 Hz, 1H), 5.00 (hept, *J* = 6.3 Hz, 1H), 3.67 (d, *J* = 7.0 Hz, 1H), 2.58 (s, 4H), 1.29 (d, *J* = 6.4 Hz, 3H), 1.27 (d, *J* = 6.4 Hz, 4H), 1.15 (d, *J* = 1.9 Hz, 3H), 1.13 (d, *J* = 1.9 Hz, 3H); <sup>13</sup>C NMR (101 MHz, CDCl<sub>3</sub>) δ 167.7, 166.9, 166.3, 149.5, 147.9, 139.0, 133.3, 132.9, 131.2, 130.5, 128.8, 127.0, 70.6, 70.4, 56.7, 52.8, 21.9, 21.8, 21.7, 21.6; IR (ATR)  $\nu_{\max}$  3190, 3110, 2982, 1723, 1170, 1101, 823 cm<sup>-1</sup>; HRMS (ESI): calcd for C<sub>21</sub>H<sub>24</sub>N<sub>2</sub>O<sub>5</sub>·Na<sup>+</sup> [M+Na]<sup>+</sup> 407.1577; found 407.1573. HPLC: Chiralpack AD-H, Pentane:*i*-PrOH 80:20, F = 1.0 mL/min, λ = 230 nm, *t*<sub>R</sub> minor = 20.8 min, *t*<sub>R</sub> major = 14.9 min

**Synthesis of 4-fluoro-2-formylbenzonitrile (**1b**)<sup>3</sup>**

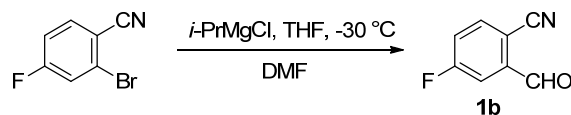

To a solution of 2-bromo-4-fluorobenzonitrile (500 mg, 2.5 mmol) in dry THF (20 mL) at -30 °C, *i*-PrMgCl (1M in THF, 3 mL, 1.2 equiv.) was added. After 3 h stirring at this temperature, DMF (580 μL, 3 equiv.) was added. The reaction was allowed to warm to 0 °C, HCl (2M, 4 mL) was added and the reaction was stirred for 20 min. The reaction mixture was concentrated under reduced pressure and the residue was purified by column chromatography on silica gel (pentane:ethyl acetate 1:6 to 1:3) to give **1b** as a pale yellow solid (264 mg, 71%). M.p. = 93 °C. <sup>1</sup>H NMR (300 MHz, CDCl<sub>3</sub>): δ 10.34 (d, *J* = 2.5 Hz, 1H), 7.87 (dd, *J* = 8.5, 4.8 Hz, 1H), 7.74 (dd, *J* = 8.1, 2.7 Hz, 1H), 7.45 (ddd, *J* = 8.5, 7.4, 2.7 Hz, 1H); <sup>13</sup>C NMR (75 MHz, CDCl<sub>3</sub>): δ 187.3 (d, *J* = 1.5 Hz), 165.2 (d, *J* = 260.2 Hz), 139.7 (d, *J* = 7.4 Hz), 136.5 (d, *J* = 8.8 Hz), 122.0 (d, *J* = 23.1 Hz), 116.5 (d, *J* = 23.6 Hz), 115.3, 110.4; <sup>19</sup>F NMR (282 MHz, CDCl<sub>3</sub>): δ -

106.4; IR (ATR)  $\nu_{\max}$  2231, 1702, 1600, 1579, 1494, 1385, 1243, 1153, 949, 889, 853, 782  $\text{cm}^{-1}$ ; HRMS (ESI): calcd for  $\text{C}_8\text{H}_4\text{FNO}\cdot\text{Na}\cdot\text{MeOH}^+ [\text{M}+\text{Na}+\text{MeOH}]^+ 204.0431$ ; found 204.0433.

#### Synthesis of 2-formyl-4,5-dimethoxybenzonitrile (**1c**)<sup>4</sup>

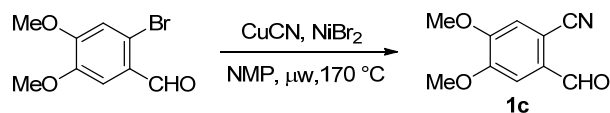

2-Bromo-4,5-Dimethoxybenzaldehyde (1.00 g, 4.0 mmol), CuCN (2.19 g, 24.48 mmol), and NiBr<sub>2</sub> (357 mg, 1.64 mmol) were dissolved in 50 mL NMP. The reaction mixture irradiated in a microwave for 4.5 min at 170 °C. After the reaction was completed the reaction mixture was poured into water (250 mL) and extracted with CH<sub>2</sub>Cl<sub>2</sub> (3x250 mL). After Evaporation of the solvent the Metall was removed by a short filtration over Silica. The solvent were removed and the product were precipitate from the NMP and water the crude product was dissolved in CH<sub>2</sub>Cl<sub>2</sub> and dried over Na<sub>2</sub>SO<sub>4</sub>, evaporated in vacuo and purified by chromatography over silicagel (Hexane/EtOAc, 7/3). The product **1c** was isolated as a white solid (564 mg, 74%). M.p. = 145 °C. <sup>1</sup>H-NMR (300 MHz, CDCl<sub>3</sub>):  $\delta$  10.27 (s, 1H), 7.49 (s, 1H), 7.18 (s, 1H), 4.00 (d,  $J$  = 0.6 Hz, 6H); <sup>13</sup>C-NMR (75 MHz, CDCl<sub>3</sub>):  $\delta$  187.7, 153.8, 153.0, 131.9, 116.2, 114.5, 109.5, 108.4, 56.8, 56.6; IR (ATR)  $\nu_{\max}$  2221, 1685, 1585, 1512, 1290, 1225, 1093, 988, 882, 753  $\text{cm}^{-1}$ ; HRMS (ESI): calcd for  $\text{C}_{10}\text{H}_9\text{NO}_3\cdot\text{Na}^+ [\text{M}+\text{Na}]^+ 214.0475$ ; found 214.0474.

#### Synthesis of 3-formyl-6-methylquinoline-2-carbonitrile (**1d**)<sup>5, 6</sup>

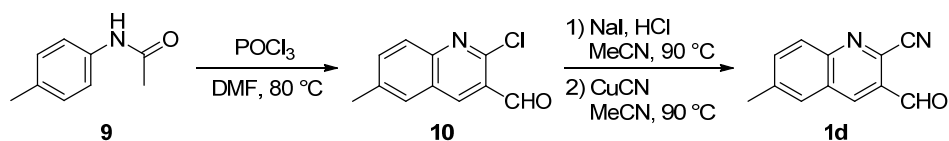

To a solution of 4-tolylaniline (1.4 g, 13 mmol) and DMAP (1.6 g, 1 equiv.) in DCM, Ac<sub>2</sub>O (1.5 mL, 1.2 equiv.) was added. The reaction was stirred at room temperature for xx h. The solvent was removed and the residue was purified by column chromatography on silica gel (pentane: ethyl acetate 1:6) to give **9** as a white solid (1.8 g, 93%). <sup>1</sup>H NMR (300 MHz, CDCl<sub>3</sub>):  $\delta$  8.06 – 7.51 (m, 1H), 7.38 (d,  $J$  = 8.4 Hz, 1H), 7.09 (d,  $J$  = 8.0 Hz, 1H), 2.30 (s, 1H), 2.14 (s, 1H). <sup>13</sup>C NMR (75 MHz, CDCl<sub>3</sub>):  $\delta$  168.8, 135.4, 134.1, 129.5, 120.3, 24.5, 21.0.

To an ice-cooled solution of DMF (1.6 mL, 3 equiv.) was added dropwise with stirring POCl<sub>3</sub> (4.3 mL, 7 equiv.). Acetamide **9** (1.0 g, 6.7 mmol, 1 equiv.) was then added and the reaction was warmed to 80 °C and stirred for 18 h. The reaction mixture was then pured into ice-water and stirred for 30 min at 0 °C. The precipitated product **10** was collected by filtration, washed with water and dried under air (800 mg, 58 %). <sup>1</sup>H NMR (300 MHz, CDCl<sub>3</sub>):  $\delta$  10.48 (s, 1H), 8.60 (s, 1H), 7.90 (d,  $J$  = 8.4 Hz, 1H), 7.73 – 7.56 (m, 2H), 2.50 (s, 1H). <sup>13</sup>C NMR (75 MHz, CDCl<sub>3</sub>):  $\delta$  189.5, 149.4, 148.4, 139.8, 138.6, 136.2, 128.6, 128.3, 126.7, 126.4, 21.7; IR (ATR)  $\nu_{\max}$  2878, 1689, 1578, 1368, 1336, 1056, 935, 820, 736  $\text{cm}^{-1}$ ; HRMS (ESI): calcd for  $\text{C}_{11}\text{H}_8\text{ClNO}\cdot\text{Na}\cdot\text{CH}_3\text{OH}^+ [\text{M}+\text{Na}+\text{MeOH}]^+ 260.0449$ ; found 260.0446.

2-Chloroquinoline **10** (500 mg, ca. 2.4 mmol, 1 equiv.), NaI (2.5 g, 7 equiv.) and conc. HCl (0.1 mL) were taken in MeCN (15 mL). The reaction was heated at 90 °C for 18 h, then diluted with water and filtered. The product was

washed with sat. NaHCO<sub>3</sub> solution, followed with water till the washings were neutral. The compound was then dried under vacuum to give the corresponding iodoquinoline **11**, which was use without further purification in the next step. To a solution of 2-iodoquinoline **11** (ca. 2.4 mmol) in MeCN (10 mL), CuCN (260 mg, 1.2 equiv.) was added, and the reaction was heated at 90 °C for 16 h. The reaction mixture was then diluted with water and extracted with AcOEt, the combined organic layer was dried over MgSO<sub>4</sub>, the solvent removed under vacuum and the residue was purified by column chromatography on silica gel (pentane:ethyl acetate 1:6 to 1:3) to give the corresponding cyano-quinoline **1d** as a pale yellow solid (150 mg, 0.77 mmol, 32% 2 steps). M.p. = 208 °C. <sup>1</sup>H NMR (300 MHz, CDCl<sub>3</sub>): δ 10.44 (s, 1H), 8.67 (s, 1H), 8.08 (d, *J* = 9.2 Hz, 1H), 7.84 – 7.66 (m, 2H), 2.57 (s, 1H). <sup>13</sup>C NMR (75 MHz, CDCl<sub>3</sub>): δ 187.7, 148.5, 141.6, 138.3, 136.6, 132.1, 129.7, 128.9, 128.2, 127.8, 115.2, 21.9; IR (ATR) ν<sub>max</sub> 2232, 1699, 1559, 1374, 1122, 830, 792 cm<sup>-1</sup>; HRMS (ESI): calcd for C<sub>12</sub>H<sub>8</sub>N<sub>2</sub>O·Na<sup>+</sup> [M+Na]<sup>+</sup> 219.0529; found 219.0533.

## References

- 1) B. Vakulya, S. Varga, A. Csampai, T. Soos *Org. Lett.* **2005**, *7*, 1967.
- 2) Synthesis of catalyst **6**: J.-R. Chen, Y.-J. Cao, Y.-Q. Zou, F. Tan, L. Fu, X.-Y. Zhu, W.-J. Xiao, *Org. Biomol. Chem.* **2010**, *8*, 1275.
- 3) C. A. Leach, J. Liddle, S. Peace, J. Philp, I. E. D. Smith, L. R. Terrell, J. Zhang, *PCT Int. Appl.* 2006, WO 2006067462A1 (Glaxo UK).
- 4) T. Noeel, K. Vandyck, J. Van der Eycken, *PCT Int. Appl.* 2010, WO 2010115903A1.
- 5) F. Curreli, H. Zhang, X. Zhang, I. Pyatkin, Z. Victor, A. Altieri, A. K. Debnath, *Bioorg. Med. Chem.* **2011**, *19*, 77.
- 6) M. B. Wagh, R. Shankar, U. K. Syam Kumar, C. H. Gill, *Synlett* **2011**, 84.
- 7) V. More, A. Di Mola, M. Perillo, P. De Caprariis, R. Filosa, A. Peduto, A. Massa *Synthesis* **2011**, 3027



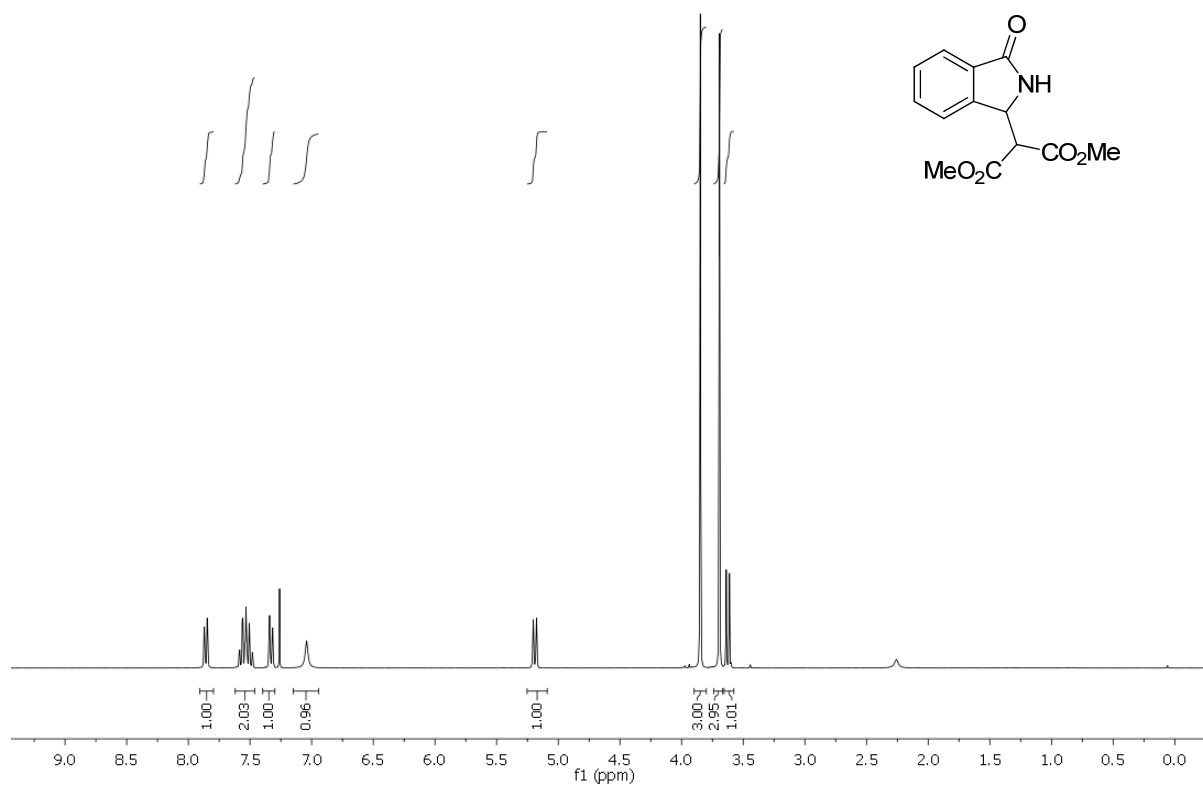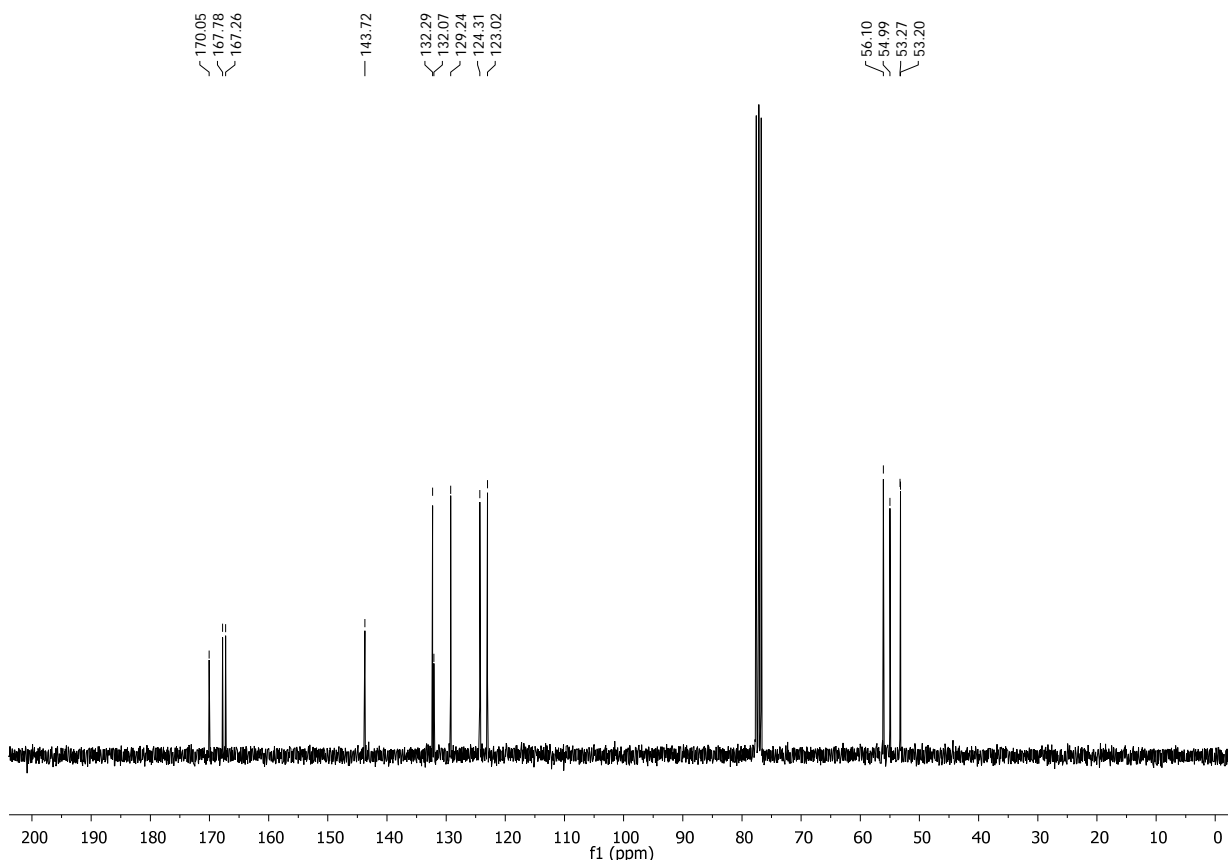

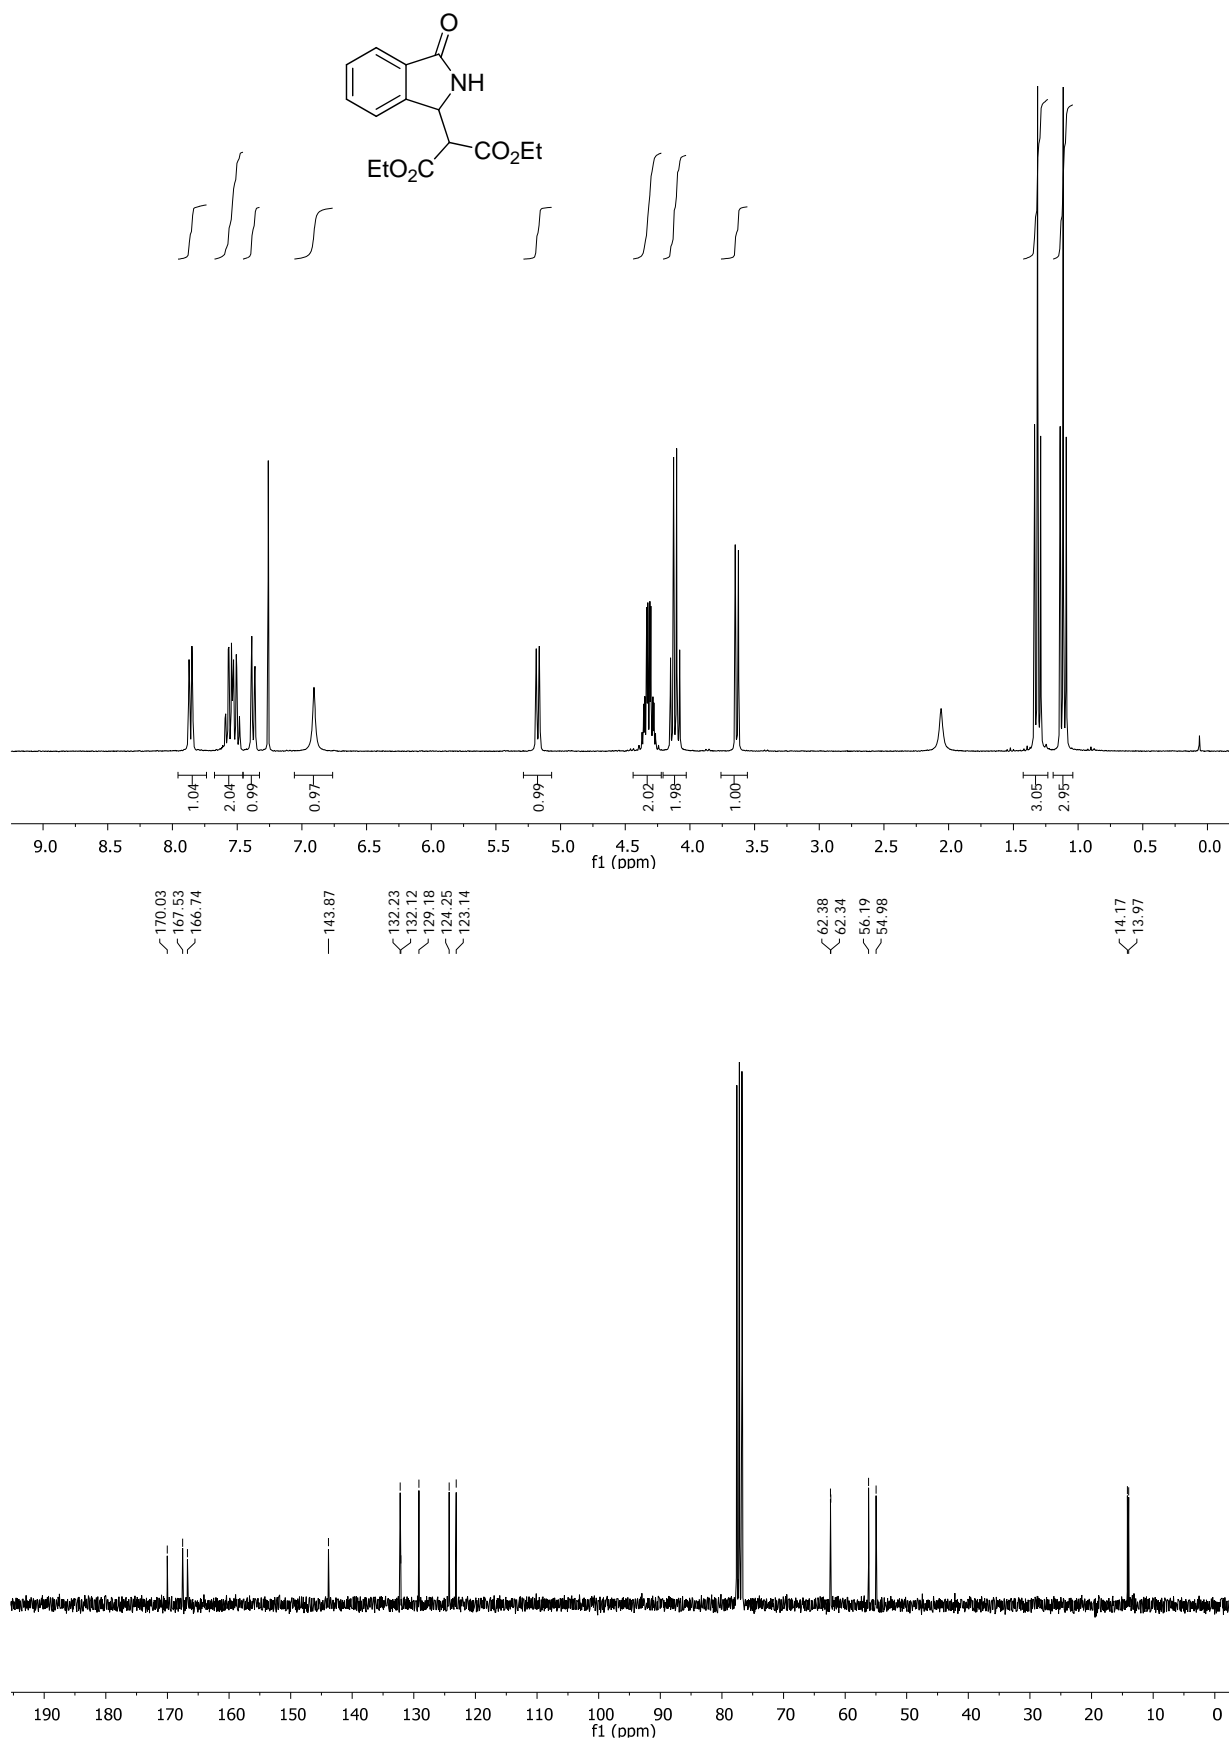

$^1\text{H}$  and  $^{13}\text{C}$ -NMR in  $\text{CDCl}_3$  for:

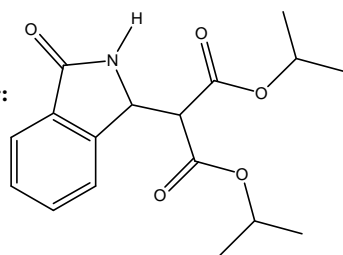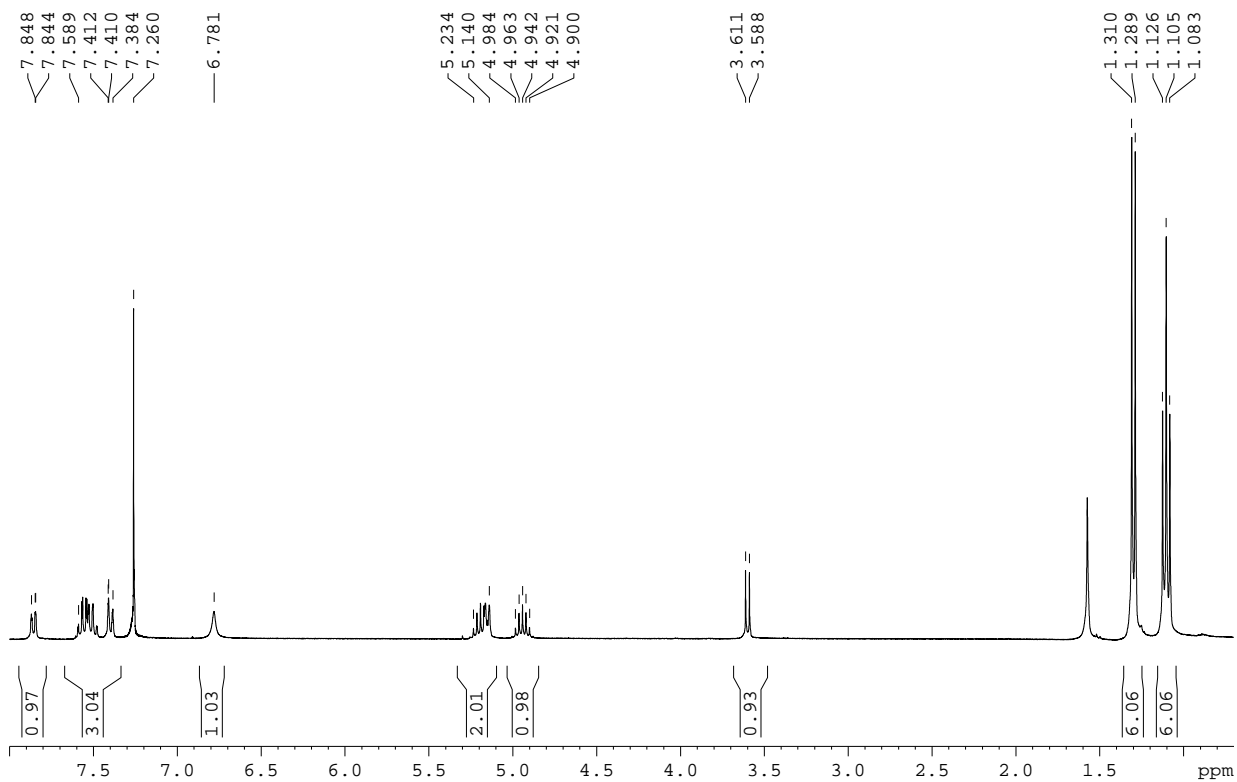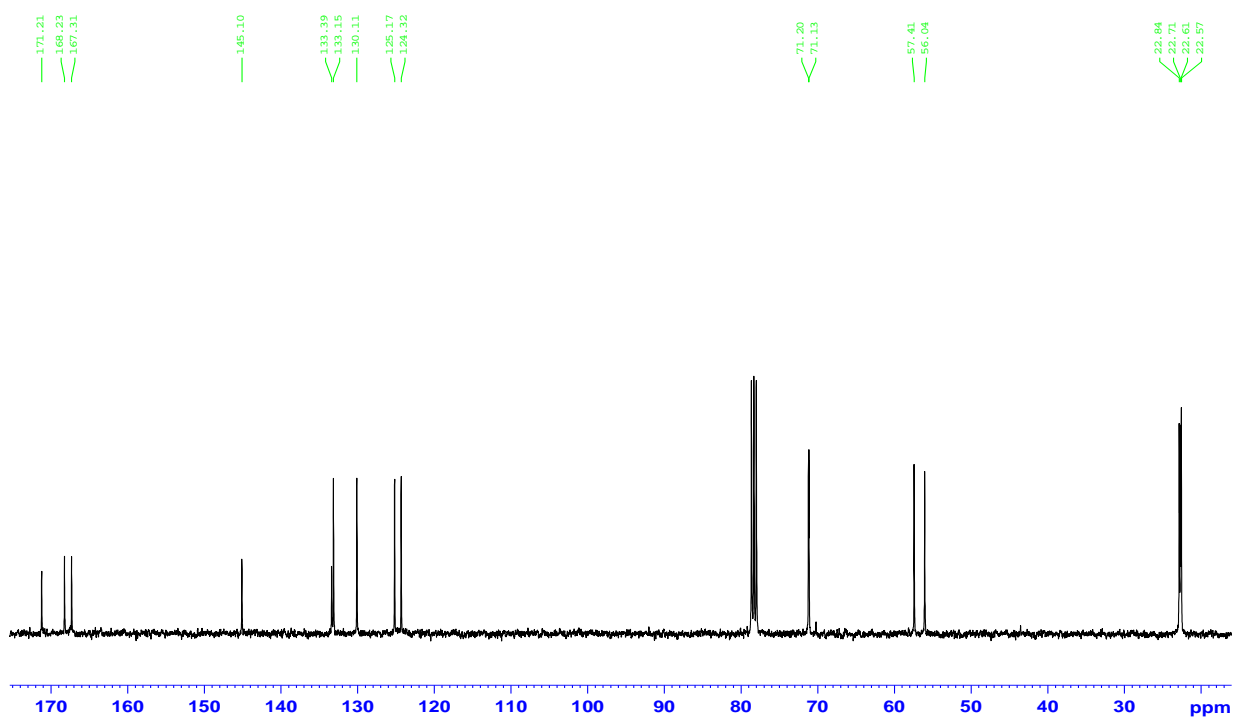

$^1\text{H}$  and  $^{13}\text{C}$ -NMR in  $\text{CDCl}_3$  for:

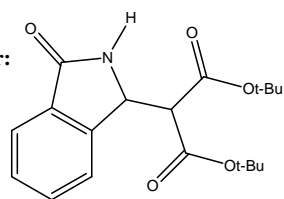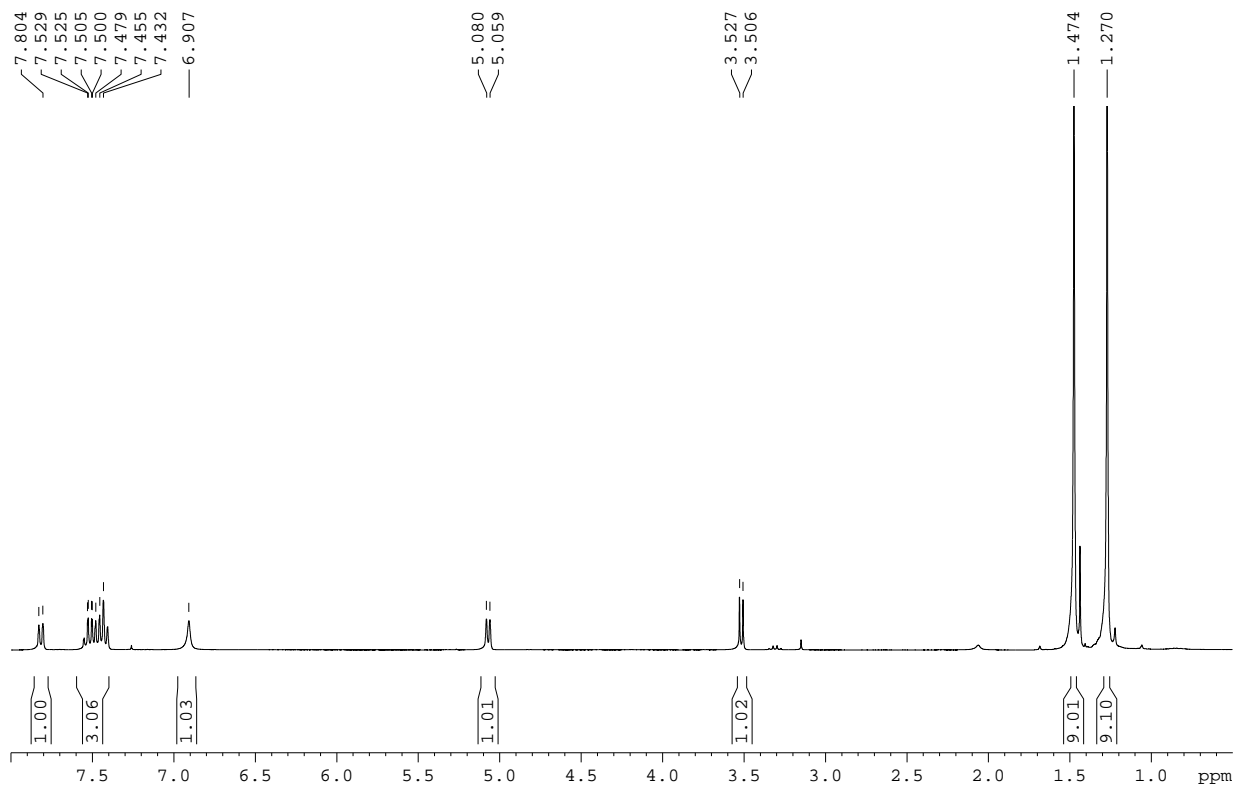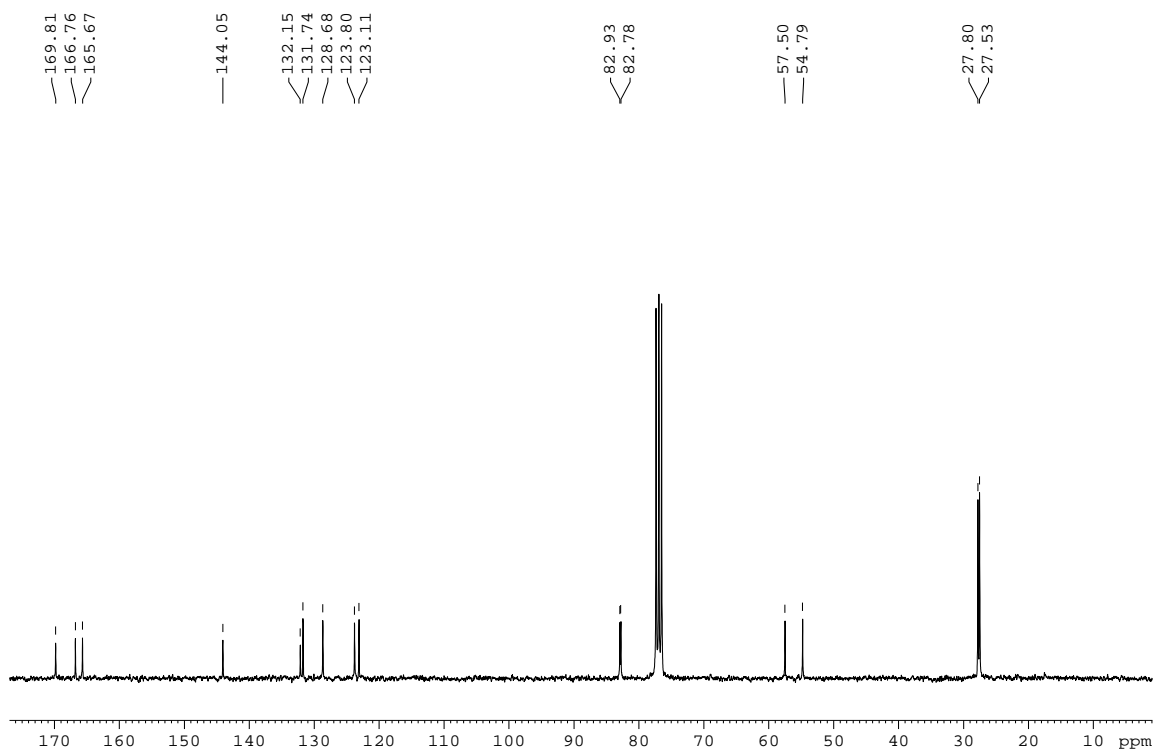

$^1\text{H}$  and  $^{13}\text{C}$ -NMR in  $\text{CD}_2\text{Cl}_2$  for:

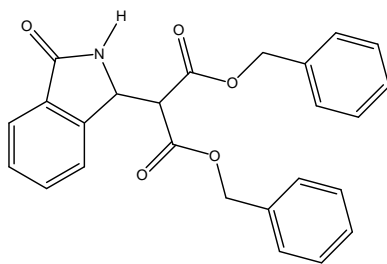

7.794  
7.469  
7.451  
7.432  
7.412  
7.395  
7.354  
7.344  
7.317  
7.314  
7.305  
7.263  
7.178  
7.159  
7.149  
6.887

5.243  
5.224  
5.197  
5.178  
5.071

3.715  
3.696

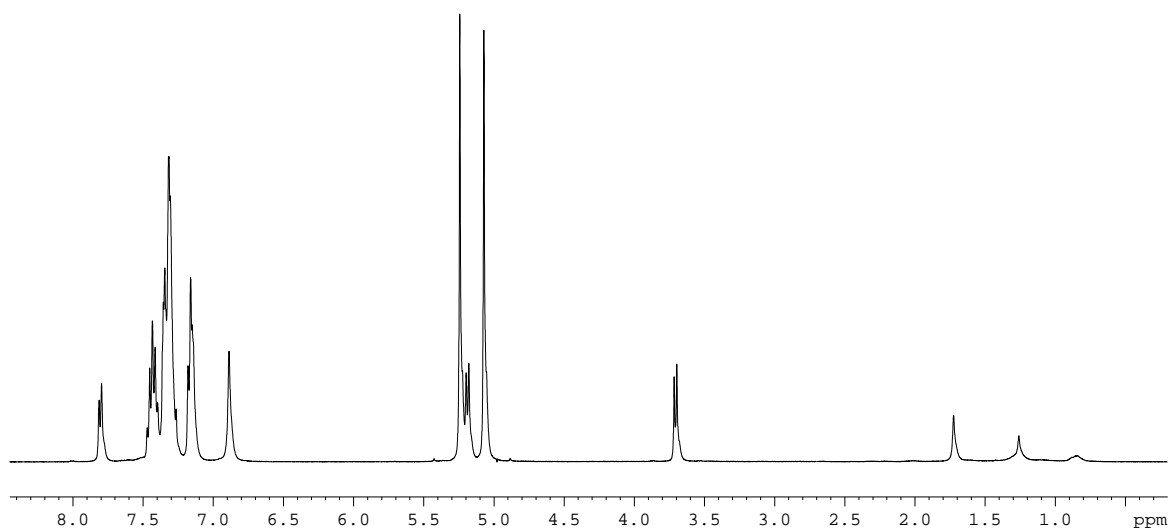

0.940  
2.407  
6.882  
2.935  
1.336

2.381  
1.271  
2.637

1.000

170.84  
168.36  
167.60

144.91  
136.12  
133.94  
133.34  
133.17  
130.12  
129.85  
129.80  
129.75  
129.65  
128.06  
125.00  
124.28

69.12  
68.97

57.21  
56.06

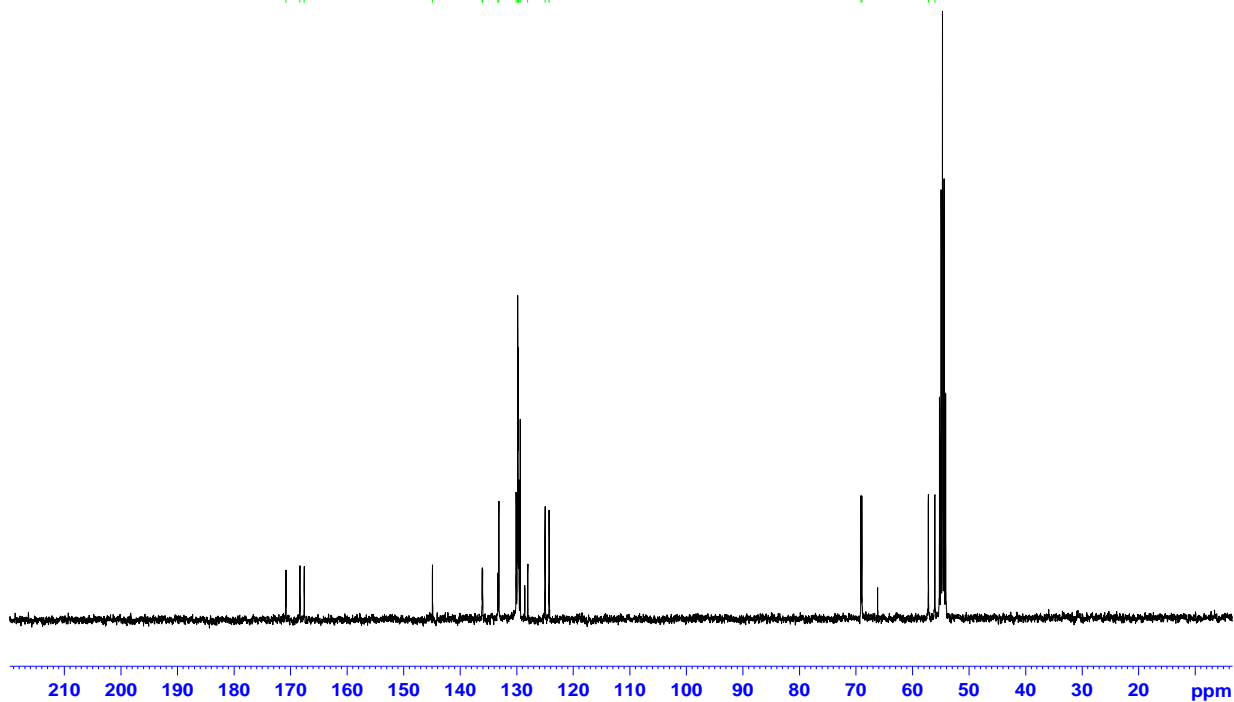

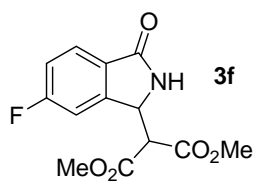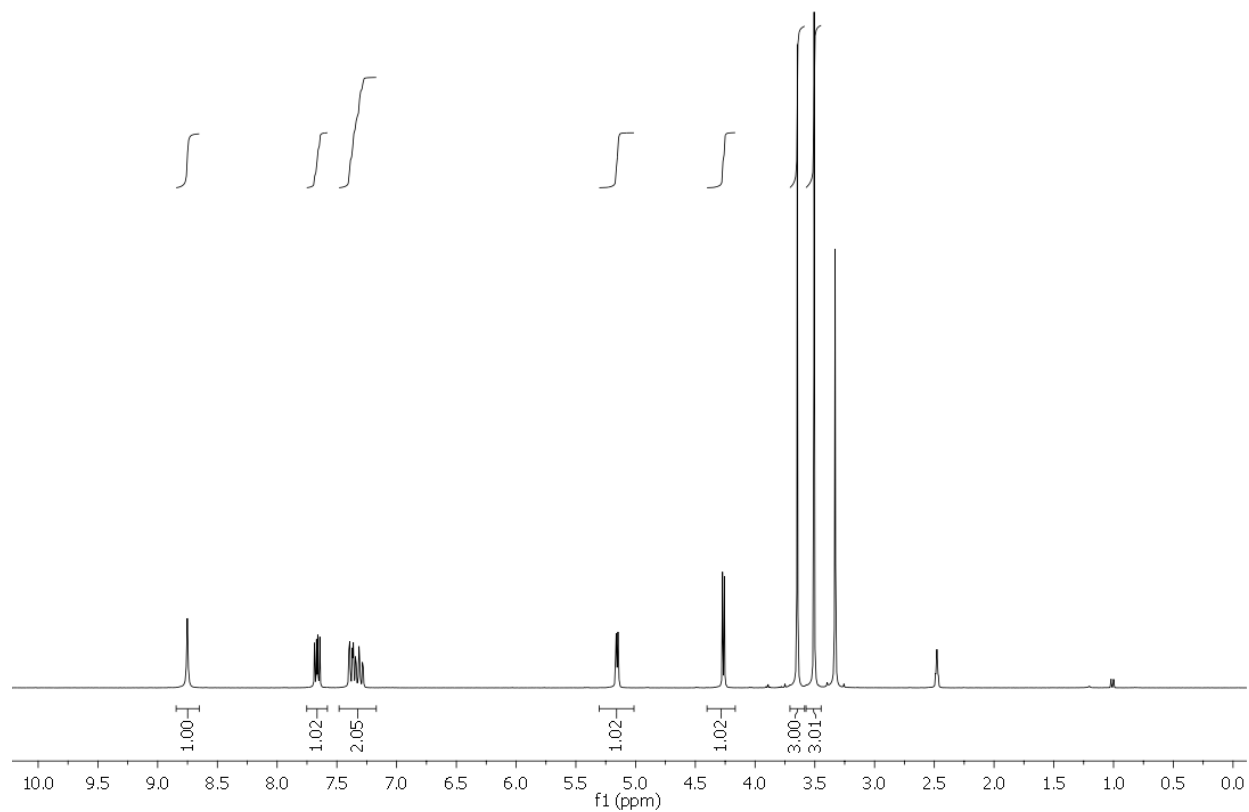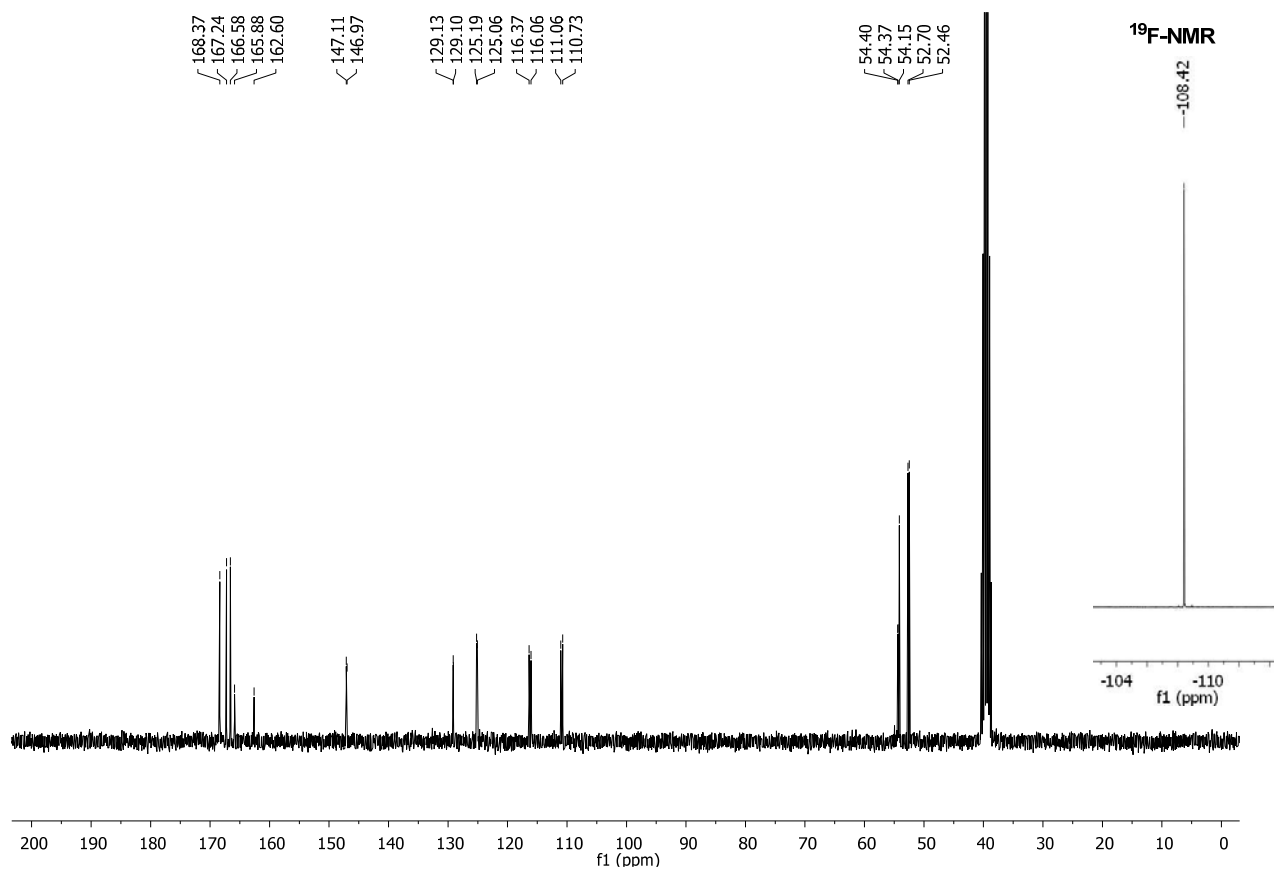

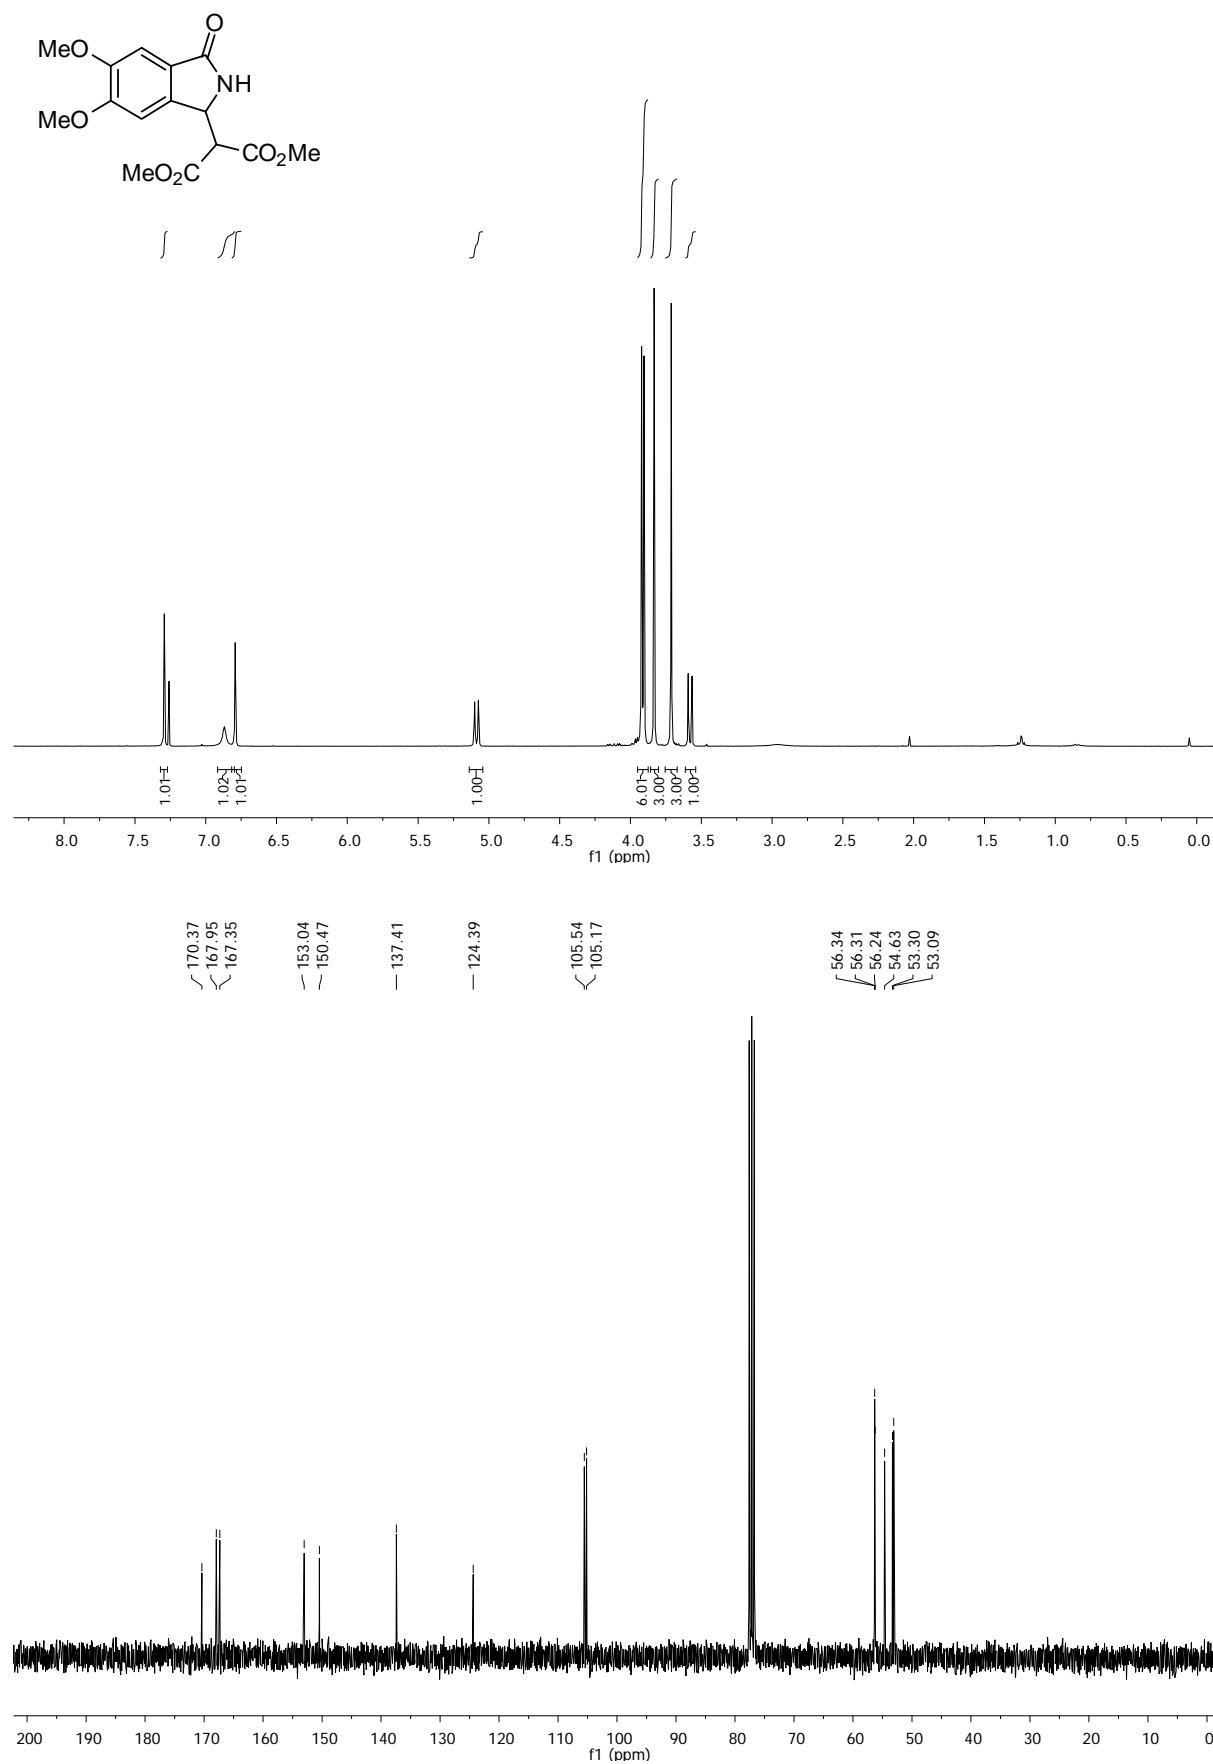

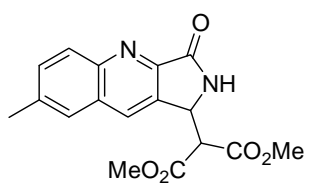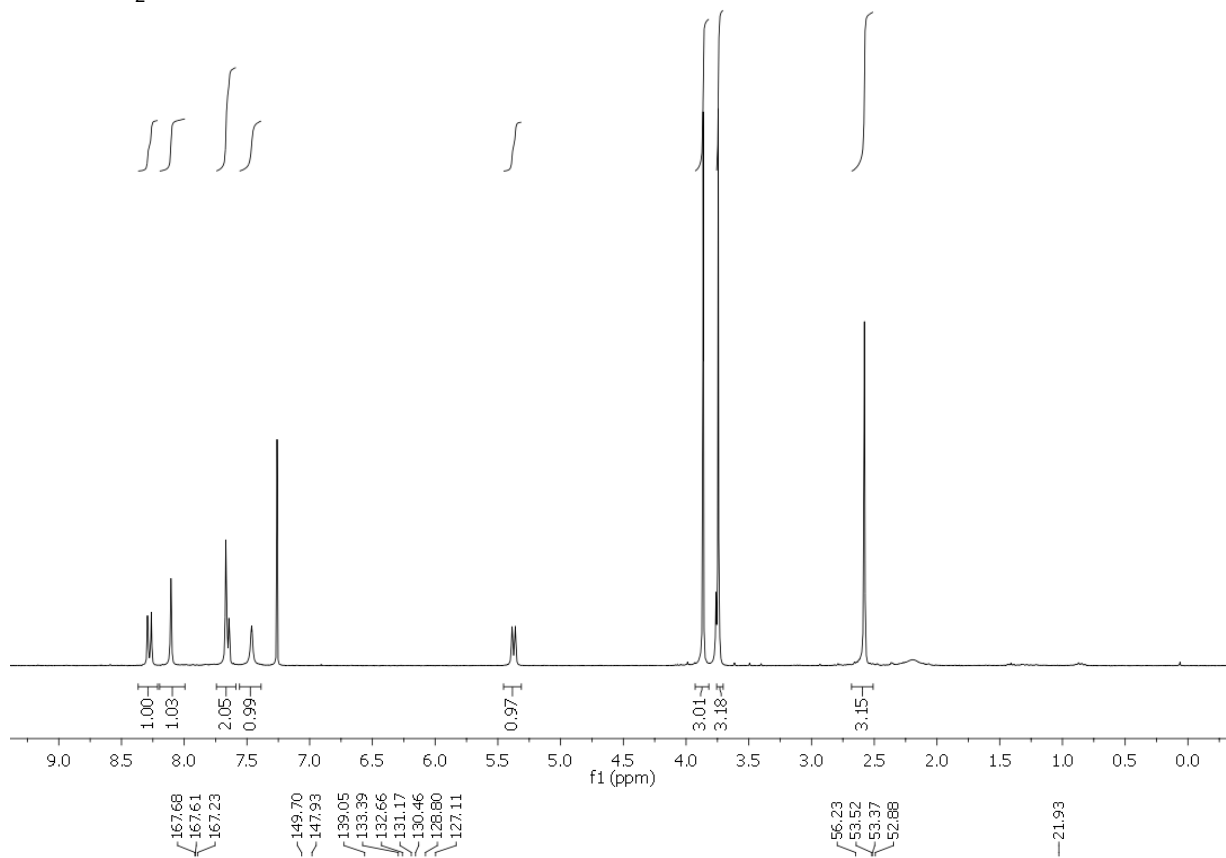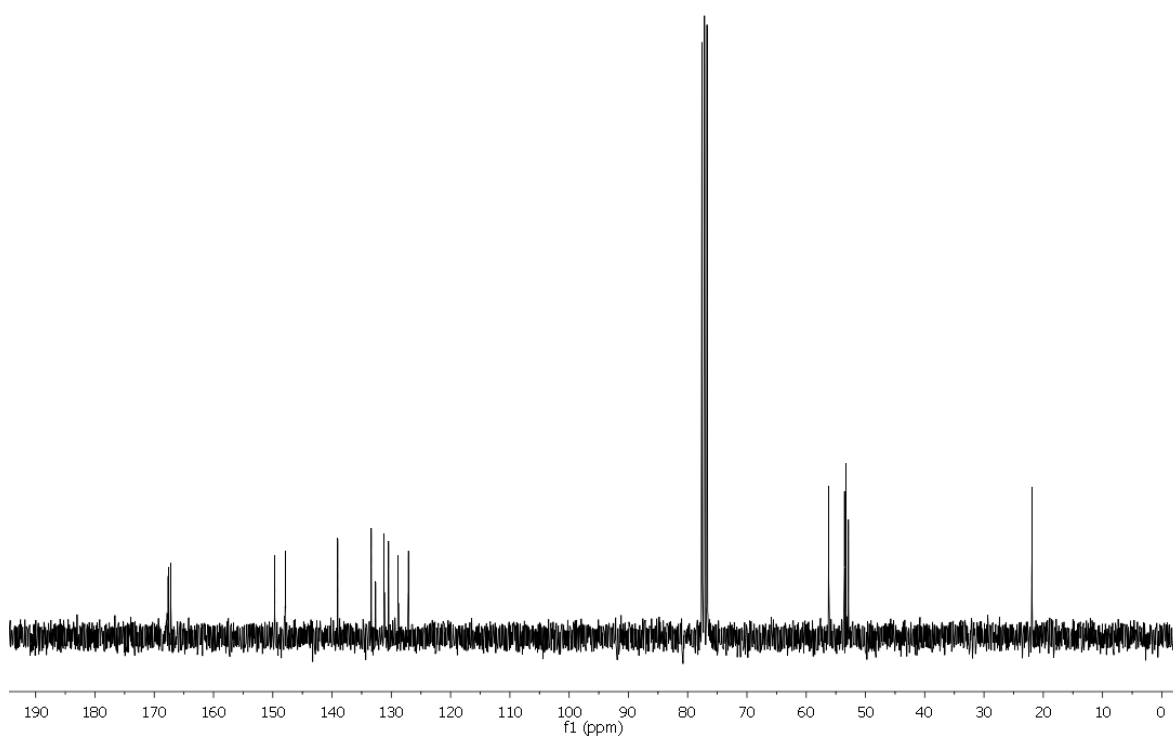



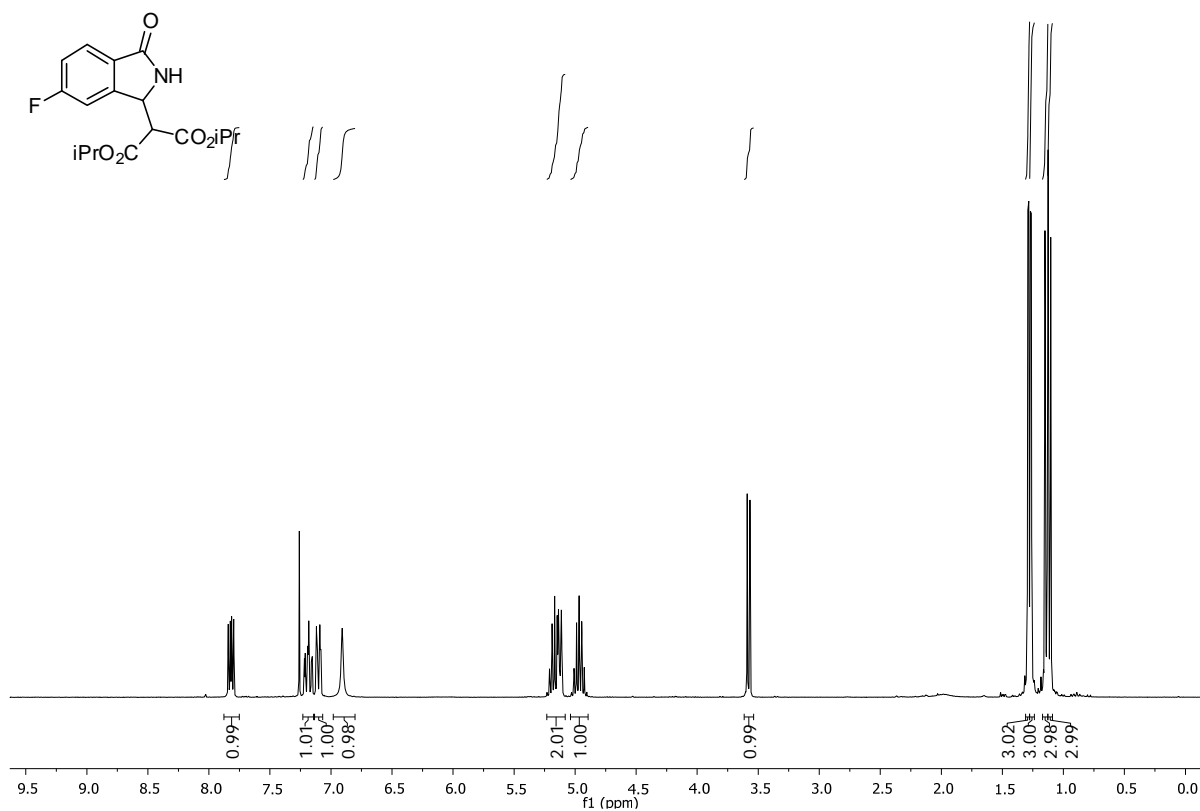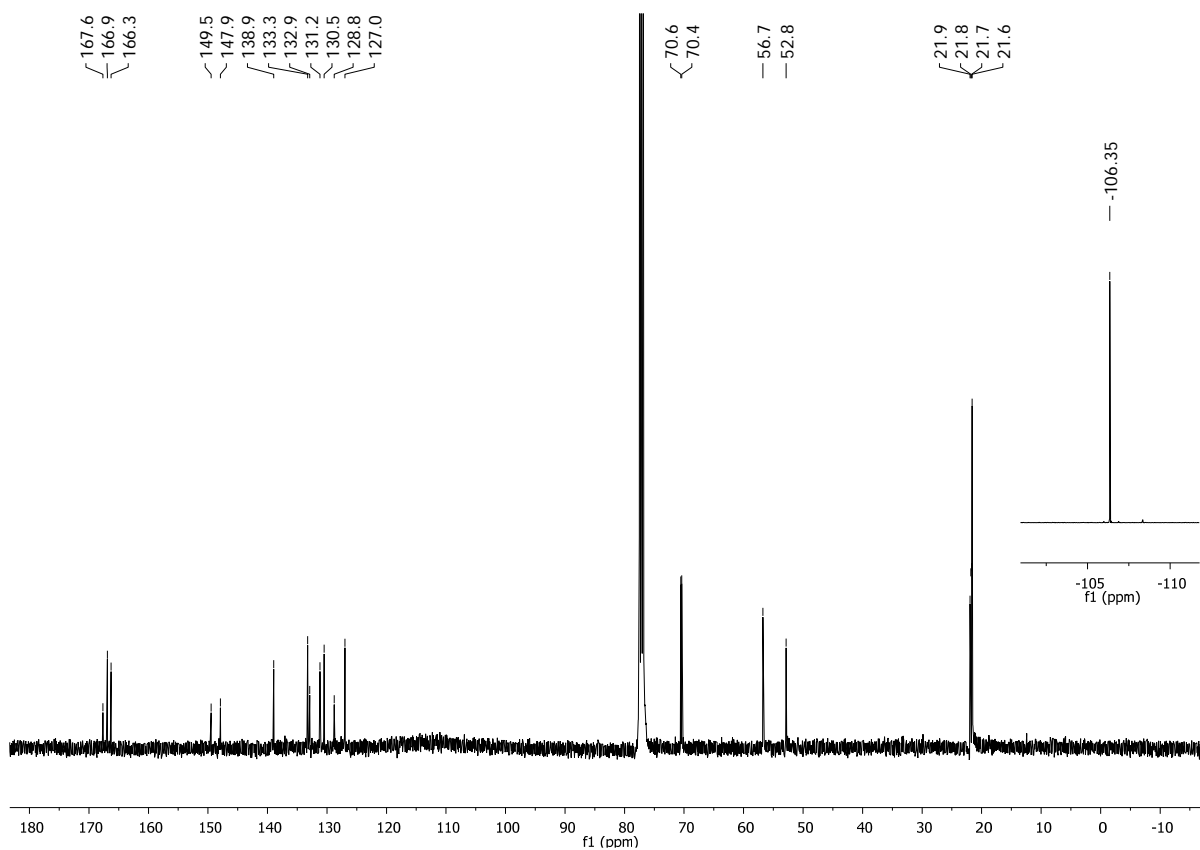

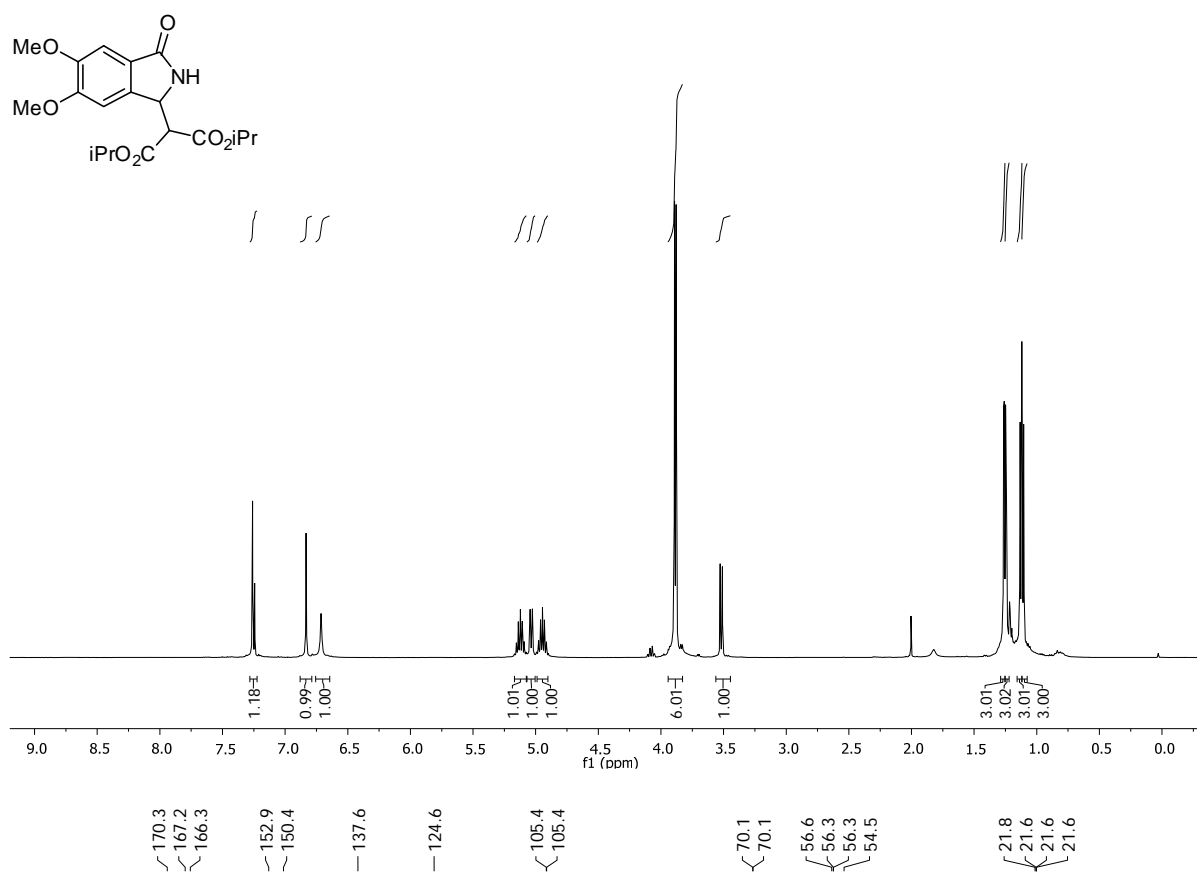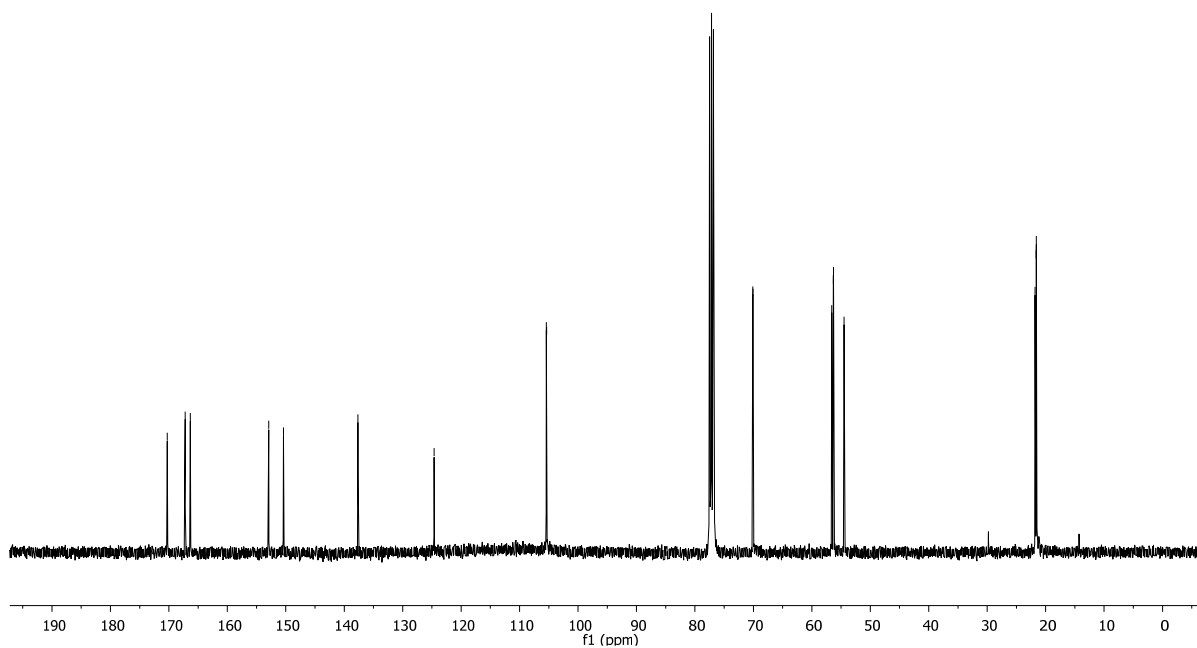

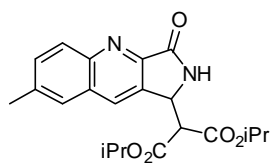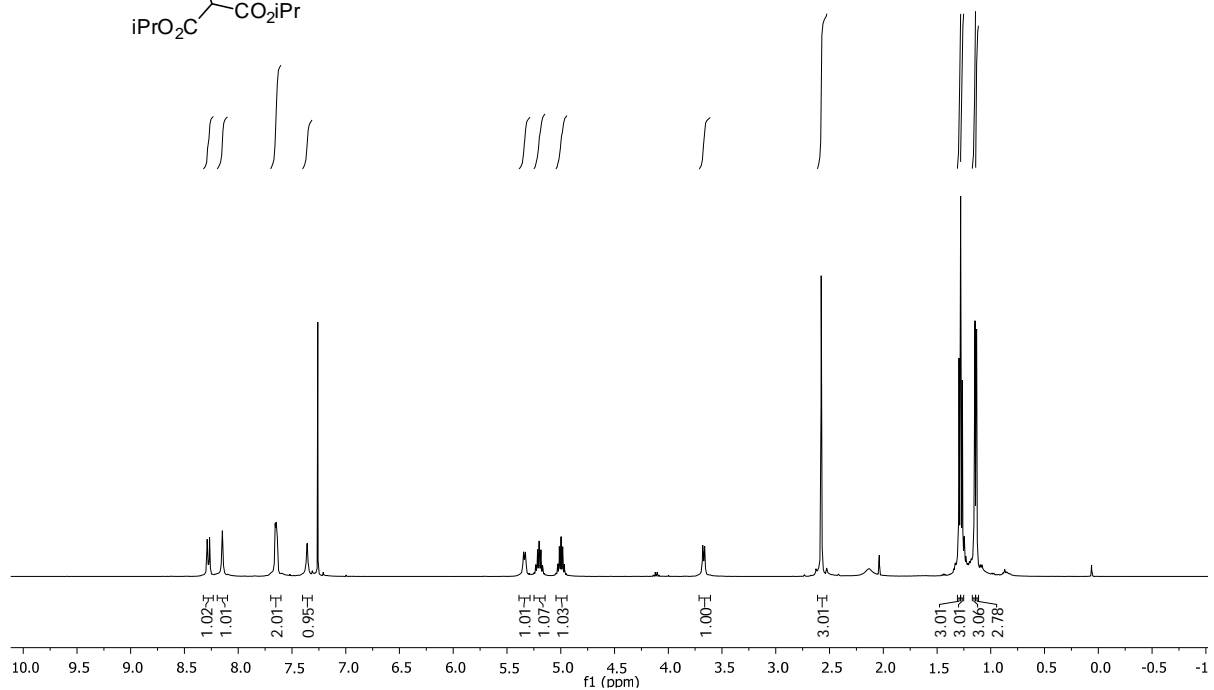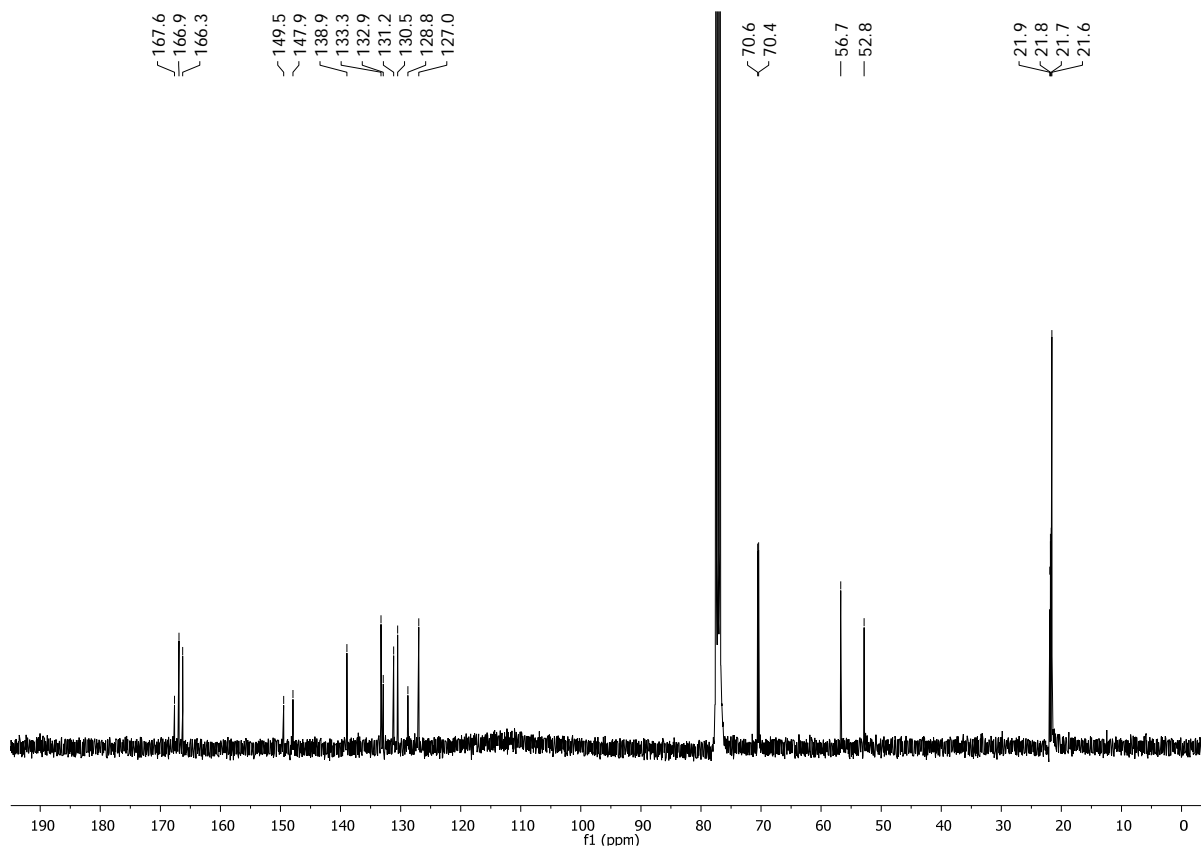

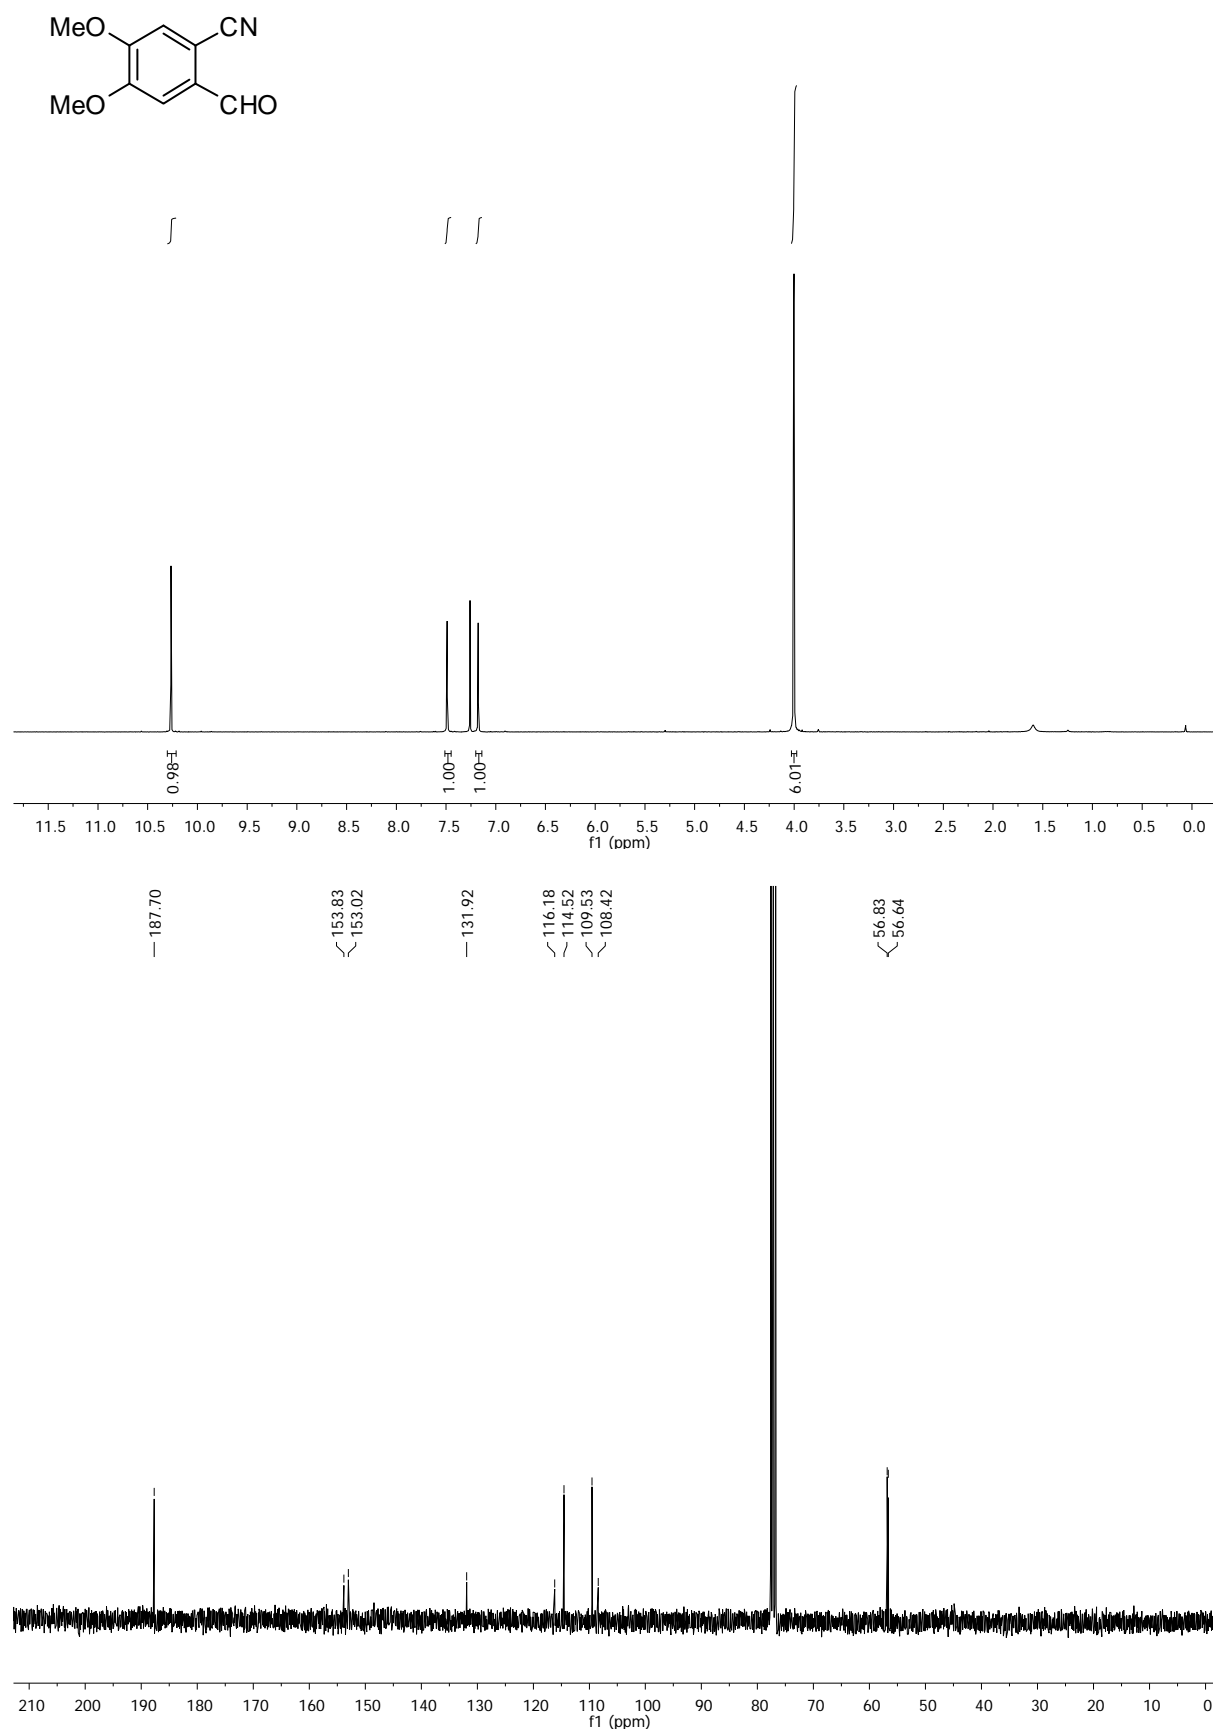

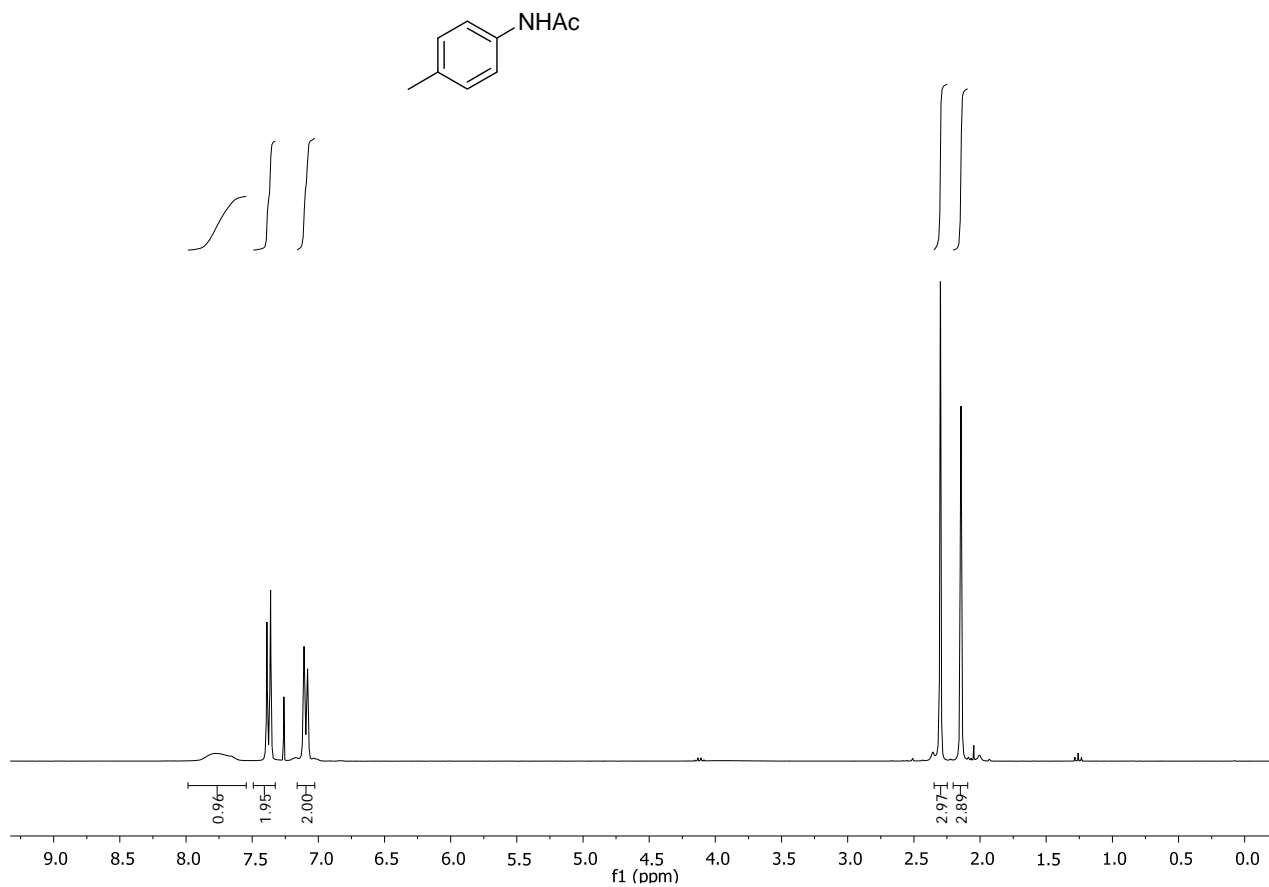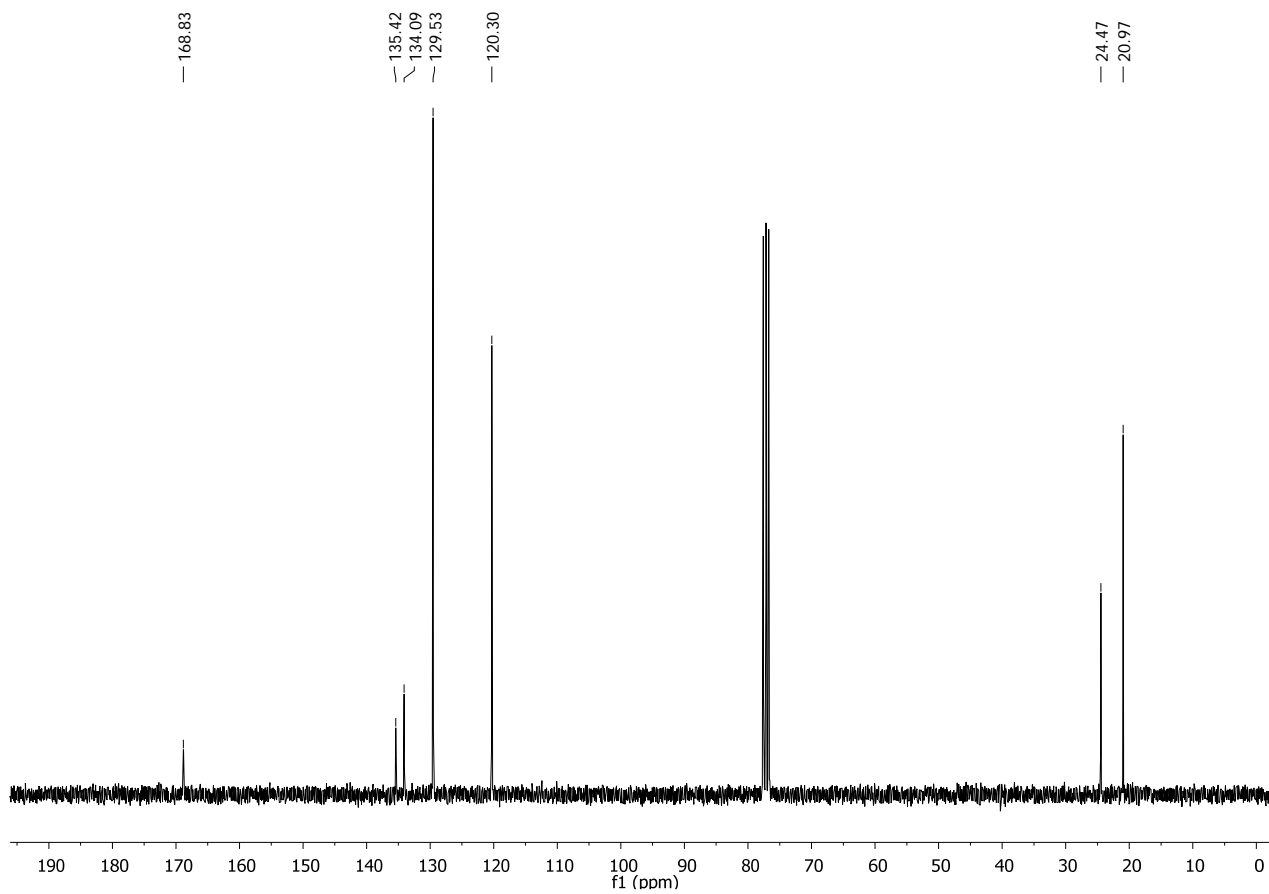

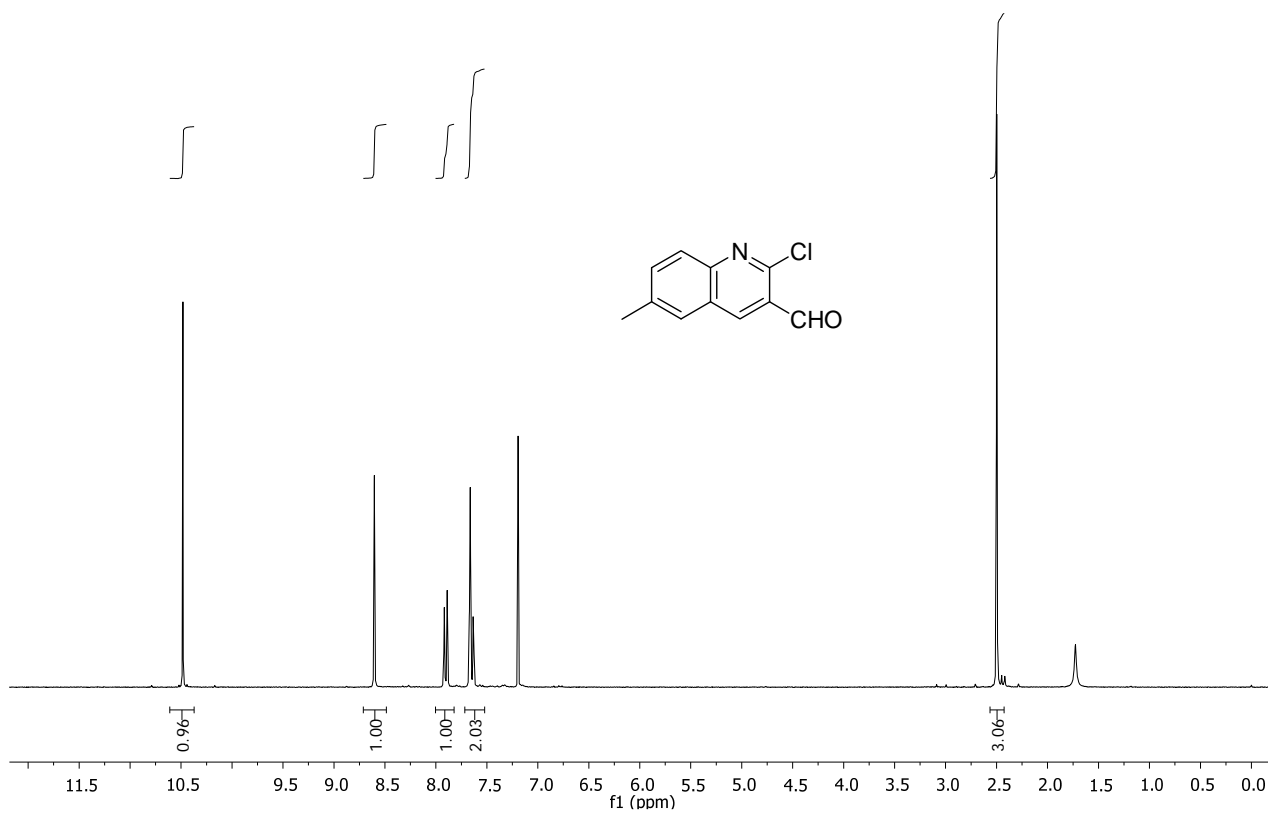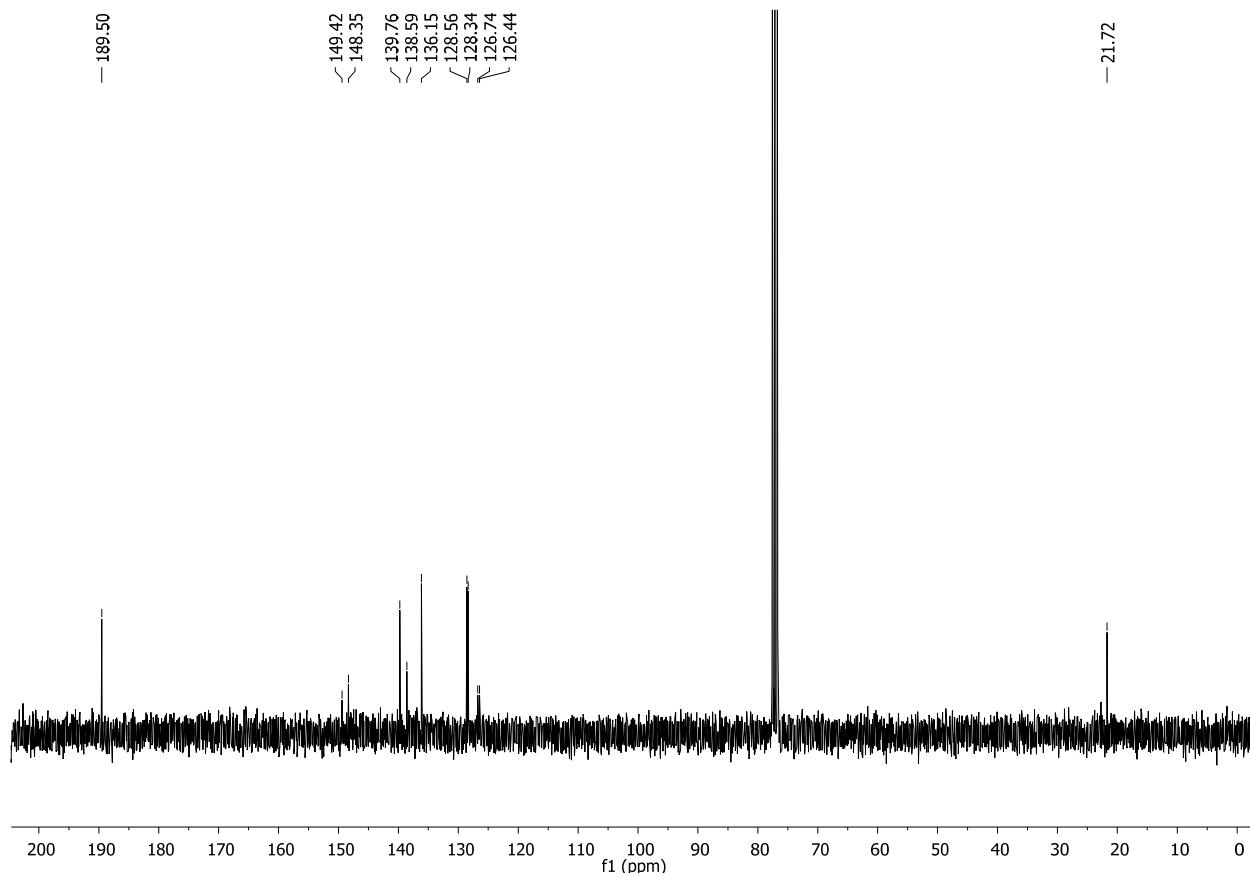

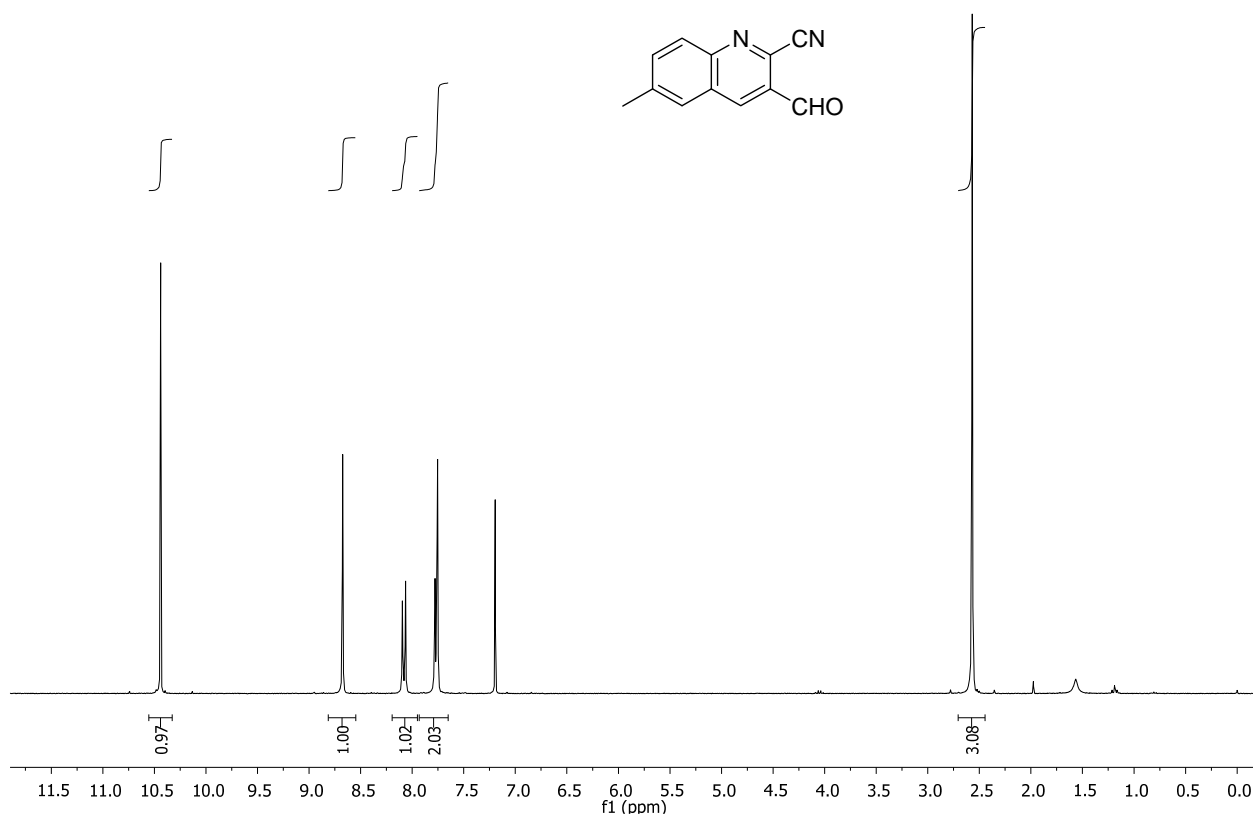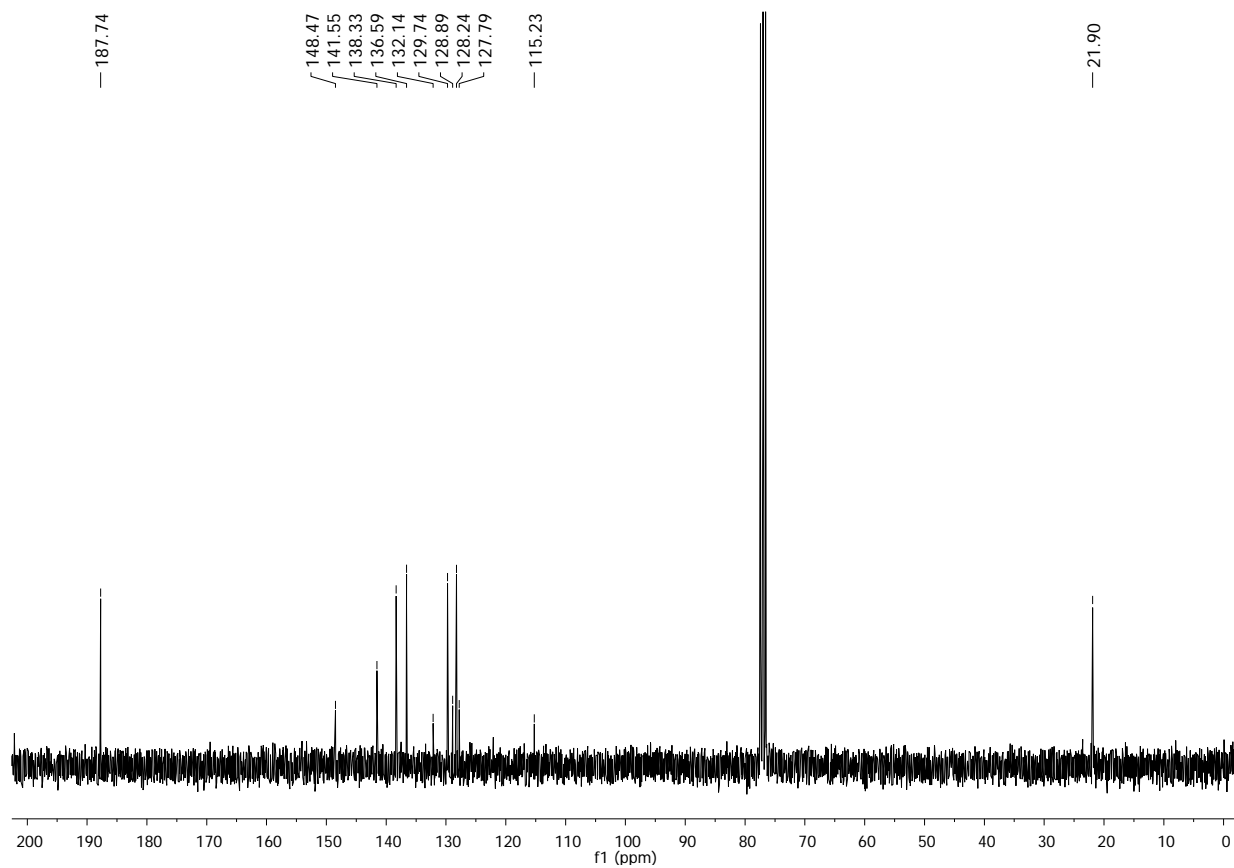

**3a:** HPLC: Chiralpak AD-H, Pentane:*i*-PrOH 70:30, F = 1.0 mL/min,  $\lambda$  = 230 nm,  $t_R$  = 9.9 min,  $t_R$  = 16.1 min.

DAD1 B, Sig=230,10 Ref=360,20 (D:\AK GARCIA\DATEN\IOGM\IOGM-MSA2-2.D)

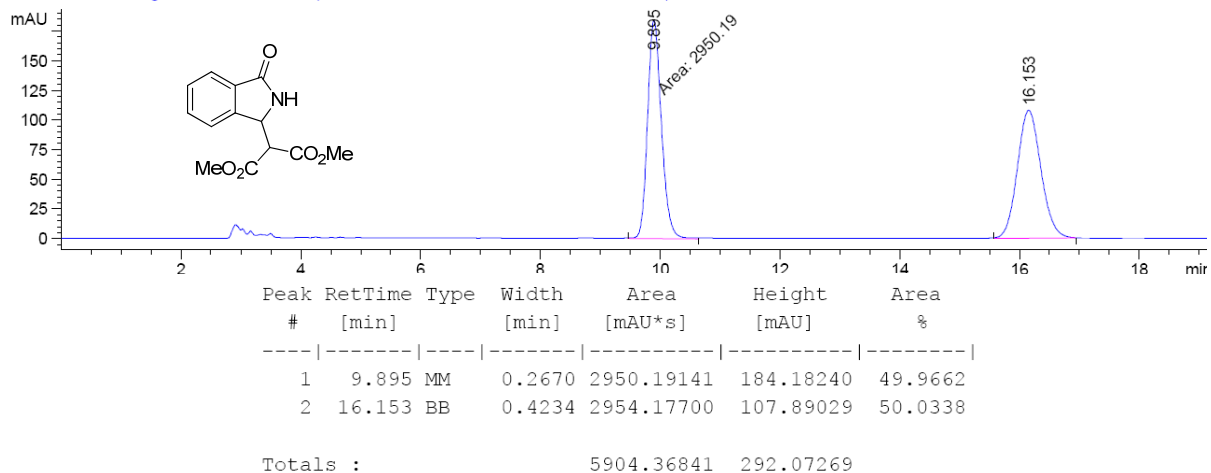

Reaction with catalyst **4**. Single recrystallization from DCM/Pentane.

DAD1 B, Sig=230,10 Ref=360,20 (D:\AK GARCIA\DATEN\IOGM\IOGM-ME-RE1L.D)

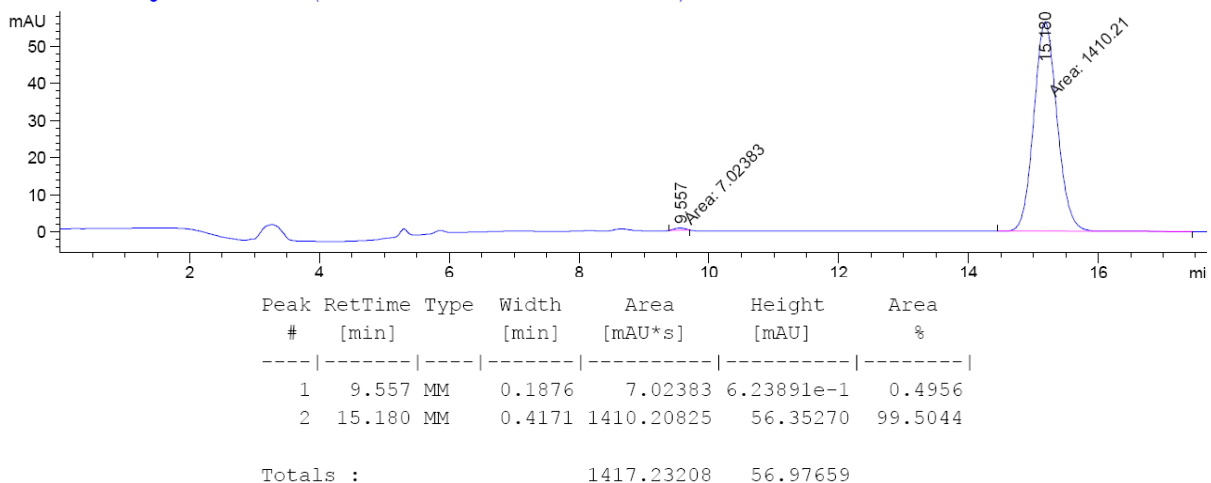

Reaction with catalyst **5**. Single recrystallization from DCM/Pentane.

DAD1 B, Sig=230,10 Ref=360,20 (D:\AK GARCIA\DATEN\IOGM\IOGM-RRO49R2.D)

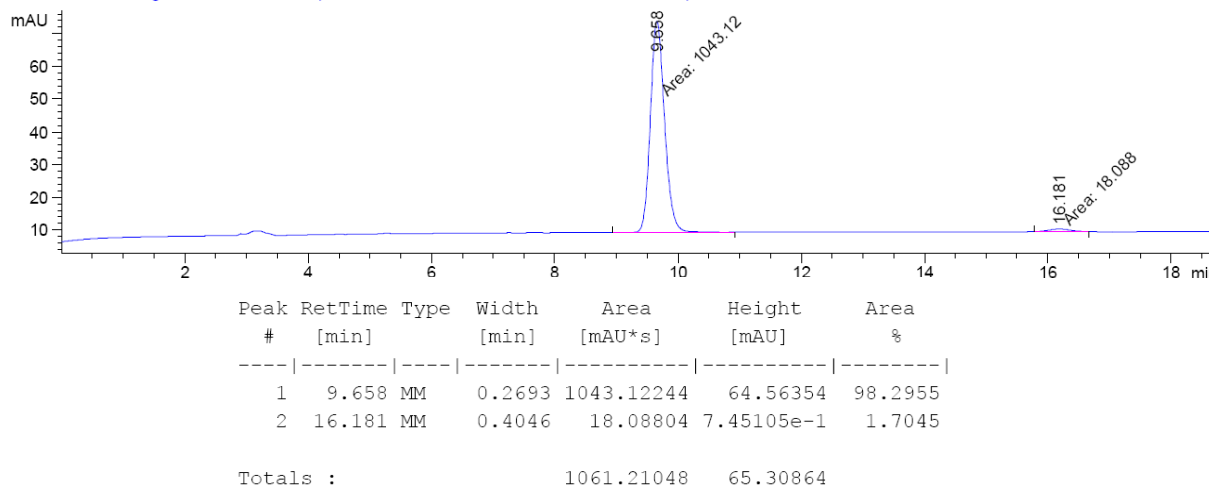



3b Chiralpack AD column, 80/20 hexane/ *i*PrOH, 0.8 mL/min .  $\lambda = 254$  nm

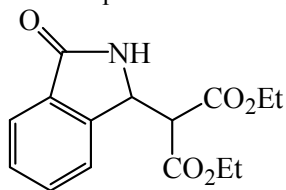

Dipartimento di Chimica

Project Name: acetoacetato  
Reported by User: System

*Breeze*

| SAMPLE INFORMATION |                                 |                  |                      |
|--------------------|---------------------------------|------------------|----------------------|
| Sample Name:       | ant-rac dietil,AD 80:20 a 0.8mL | Acquired By:     | System               |
| Sample Type:       | Unknown                         | Date Acquired:   | 11/8/2011 4:29:13 PM |
| Vial:              | 1                               | Acq. Method:     | 80 20 a 08 ml        |
| Injection #:       | 1                               | Date Processed:  | 11/8/2011 5:02:58 PM |
| Injection Volume:  | 20.00 ul                        | Channel Name:    | 2487Channel 1        |
| Run Time:          | 120.00 Minutes                  | Channel Desc.:   |                      |
| Column Type:       |                                 | Sample Set Name: |                      |

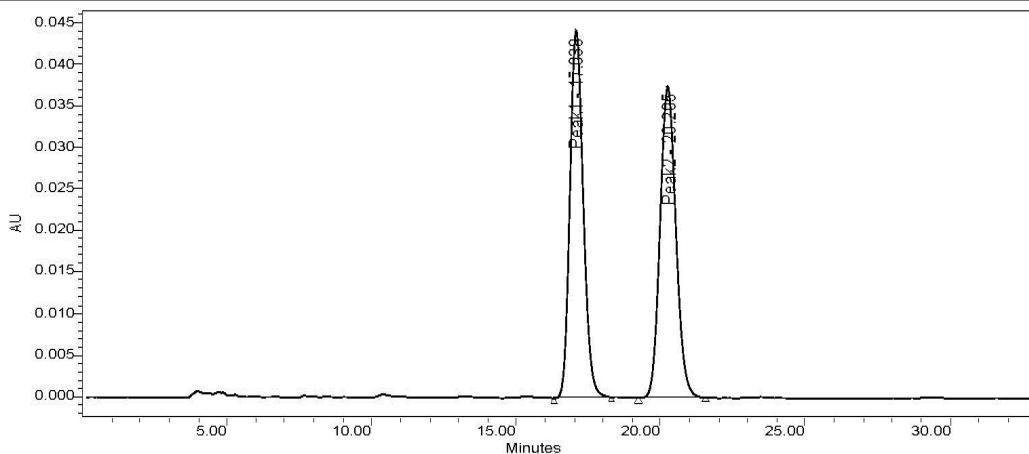

| Peak Name | RT (min) | Area (V*sec) | % Area | Height (V) | % Height |
|-----------|----------|--------------|--------|------------|----------|
| 1 Peak1   | 17.038   | 1417967      | 50.00  | 44281      | 54.24    |
| 2 Peak2   | 20.205   | 1418147      | 50.00  | 37355      | 45.76    |

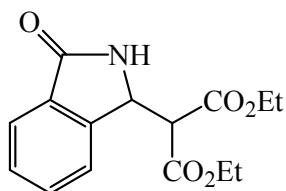

Dipartimento di Chimica

Project Name: acetoacetato

Reported by User: System

Breeze

SAMPLE INFORMATION

|                   |                          |                  |                       |
|-------------------|--------------------------|------------------|-----------------------|
| Sample Name:      | ant-276, AD 80:20 a0.8mL | Acquired By:     | System                |
| Sample Type:      | Unknown                  | Date Acquired:   | 12/9/2011 8:22:44 PM  |
| Vial:             | 1                        | Acq. Method:     | 80 20 a 08 ml         |
| Injection #:      | 10                       | Date Processed:  | 12/12/2011 6:55:45 PM |
| Injection Volume: | 20.00 ul                 | Channel Name:    | 2487Channel 1         |
| Run Time:         | 120.00 Minutes           | Channel Desc.:   |                       |
| Column Type:      |                          | Sample Set Name: |                       |

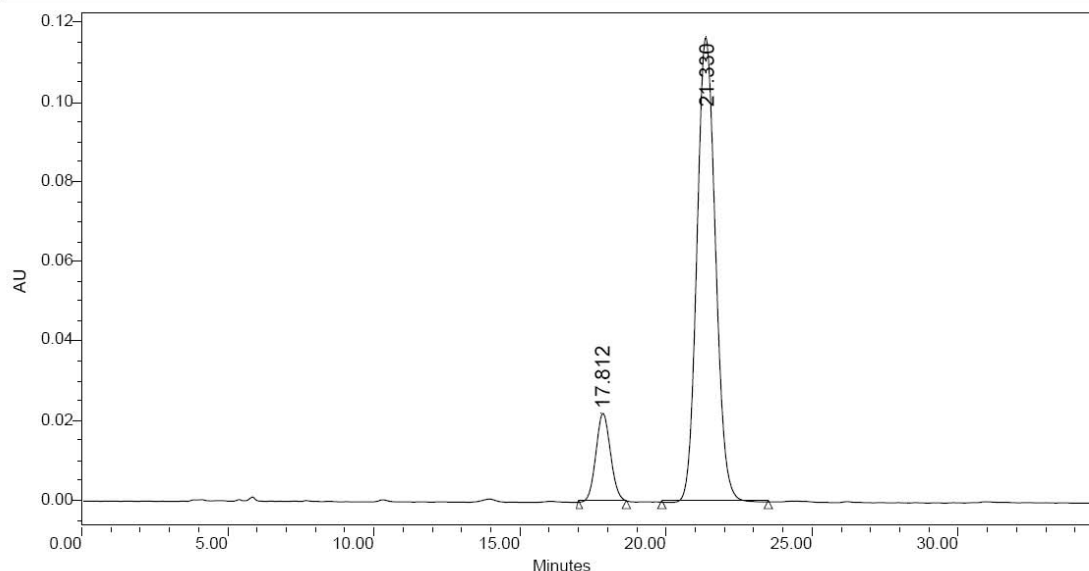

|   | RT (min) | Area (V*sec) | % Area | Height (V) | % Height |
|---|----------|--------------|--------|------------|----------|
| 1 | 17.812   | 773355       | 13.03  | 22177      | 15.98    |
| 2 | 21.330   | 5160721      | 86.97  | 116637     | 84.02    |

3c Chiralpak AD-H column, 95/5 hexane/ *i*PrOH, 0.8 mL/min.  $\lambda = 254$  nm

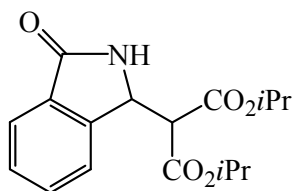

Dipartimento di Chimica  
Project Name: acetoacetato  
Reported by User: System

Breeze

| SAMPLE INFORMATION |                               |                  |                       |
|--------------------|-------------------------------|------------------|-----------------------|
| Sample Name:       | AdriD-6,Rac.ipma.ADH95:5a0.8M | Acquired By:     | System                |
| Sample Type:       | Unknown                       | Date Acquired:   | 10/14/2011 6:32:49 PM |
| Vial:              | 1                             | Acq. Method:     | 95 a 5 08ml           |
| Injection #:       | 6                             | Date Processed:  | 10/14/2011 8:29:38 PM |
| Injection Volume:  | 20.00 ul                      | Channel Name:    | 2487Channel 1         |
| Run Time:          | 120.00 Minutes                | Channel Desc.:   |                       |
| Column Type:       |                               | Sample Set Name: |                       |

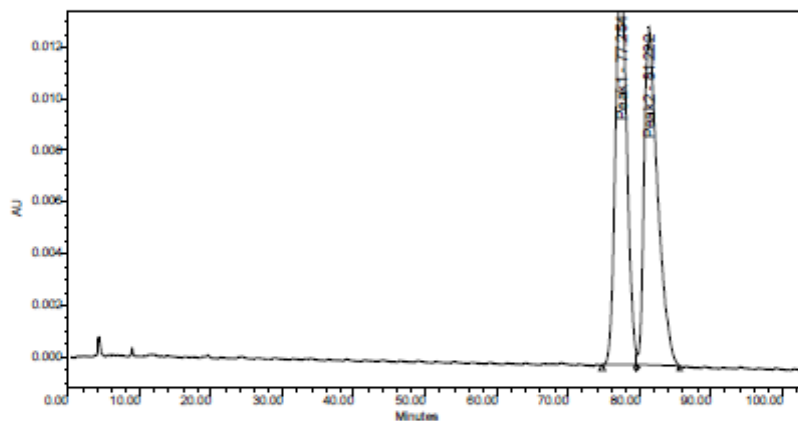

| Peak Name | RT (min) | Area (V*sec) | % Area | Height (V) | % Height |
|-----------|----------|--------------|--------|------------|----------|
| 1 Peak1   | 77.254   | 1724832      | 49.88  | 15480      | 54.12    |
| 2 Peak2   | 81.222   | 1732974      | 50.12  | 13125      | 45.88    |

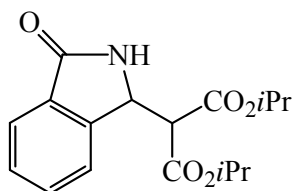

Dipartimento di Chimica

Project Name: acetoacetato  
Reported by User: System

Breeze

SAMPLE INFORMATION

|                   |                            |                  |                        |
|-------------------|----------------------------|------------------|------------------------|
| Sample Name:      | ant-277 AD-H, 95:05 a0.8mL | Acquired By:     | System                 |
| Sample Type:      | Unknown                    | Date Acquired:   | 12/13/2011 11:23:36 AM |
| Vial:             | 1                          | Acq. Method:     | 95 a 5 08ml            |
| Injection #:      | 1                          | Date Processed:  | 12/13/2011 1:23:59 PM  |
| Injection Volume: | 20.00 ul                   | Channel Name:    | 2487Channel 1          |
| Run Time:         | 120.00 Minutes             | Channel Desc.:   |                        |
| Column Type:      |                            | Sample Set Name: |                        |

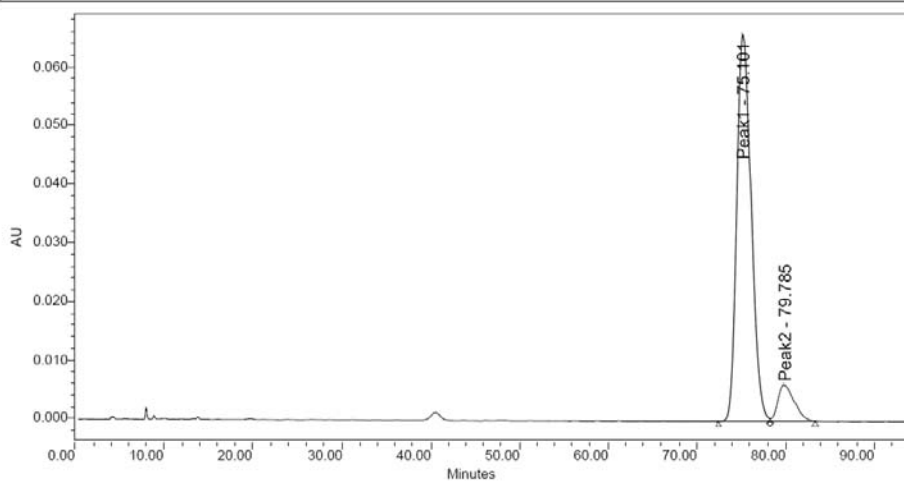

| Peak Name | RT (min) | Area (V*sec) | % Area | Height (V) | % Height |
|-----------|----------|--------------|--------|------------|----------|
| 1 Peak1   | 75.101   | 7477606      | 90.40  | 66026      | 91.39    |
| 2 Peak2   | 79.785   | 794413       | 9.60   | 6224       | 8.61     |

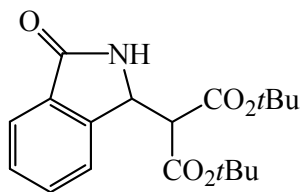

Dipartimento di Chimica  
Project Name: acetoacetato  
Reported by User: System

*Breeze*

SAMPLE INFORMATION

|                   |                |                  |                     |
|-------------------|----------------|------------------|---------------------|
| Sample Name:      | va-97 ADH      | Acquired By:     | System              |
| Sample Type:      | Unknown        | Date Acquired:   | 3/9/2011 1:16:44 PM |
| Vial:             | 1              | Acq. Method:     | 9 a 1 06ml          |
| Injection #:      | 3              | Date Processed:  | 3/9/2011 2:33:29 PM |
| Injection Volume: | 20.00 ul       | Channel Name:    | 2487Channel 1       |
| Run Time:         | 130.00 Minutes | Channel Desc.:   |                     |
| Column Type:      |                | Sample Set Name: |                     |

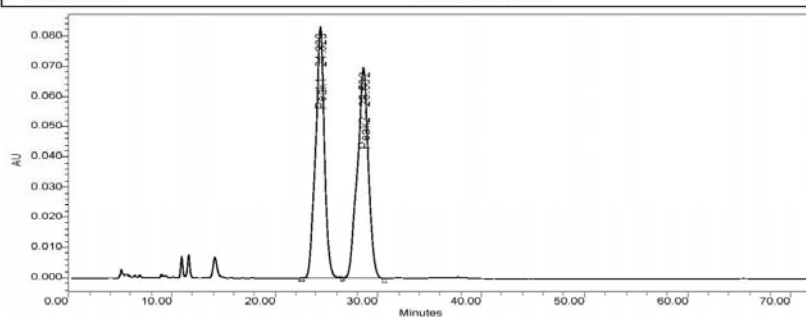

| Peak Name | RT (min) | Area (V*sec) | % Area | Height (V) | % Height |
|-----------|----------|--------------|--------|------------|----------|
| 1 Peak1   | 24.329   | 4949541      | 48.91  | 82655      | 54.33    |
| 2 Peak2   | 28.502   | 5170905      | 51.09  | 69476      | 45.67    |

3d Chiralpack AD-H column, 9/1 hexane/ *i*PrOH, 0.6 mL/min  $\lambda = 254$  nm

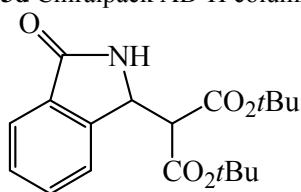

Dipartimento di Chimica

Project Name: acetoacetato

Reported by User: System

*Breeze*

| SAMPLE INFORMATION |                           |                  |                      |
|--------------------|---------------------------|------------------|----------------------|
| Sample Name:       | ant-248 ADH 90:10 a 0.6mL | Acquired By:     | System               |
| Sample Type:       | Unknown                   | Date Acquired:   | 11/3/2011 7:46:42 PM |
| Vial:              | 1                         | Acq. Method:     | 9 a 1 06ml           |
| Injection #:       | 2                         | Date Processed:  | 11/3/2011 8:22:33 PM |
| Injection Volume:  | 20.00 ul                  | Channel Name:    | 2487Channel 1        |
| Run Time:          | 120.00 Minutes            | Channel Desc.:   |                      |
| Column Type:       |                           | Sample Set Name: |                      |

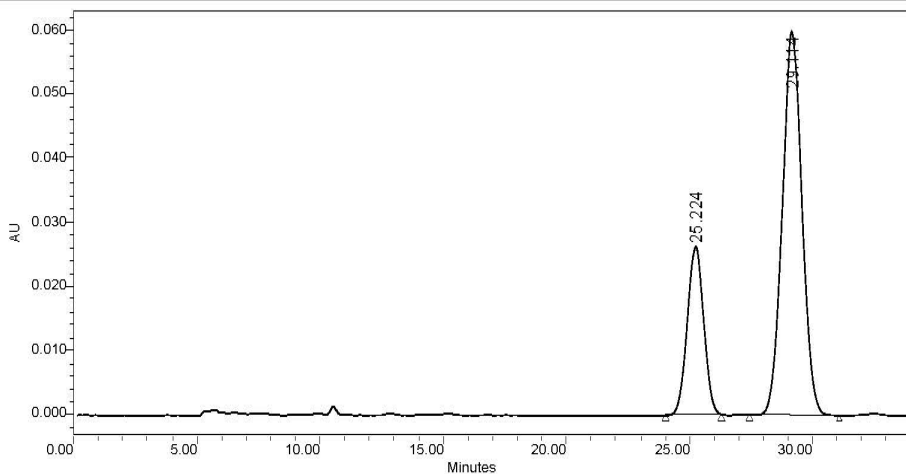

|   | RT (min) | Area ( $\Delta V \cdot \text{sec}$ ) | % Area | Height ( $\Delta V$ ) | % Height |
|---|----------|--------------------------------------|--------|-----------------------|----------|
| 1 | 25.224   | 1224787                              | 26.96  | 26264                 | 30.48    |
| 2 | 29.114   | 3317528                              | 73.04  | 59892                 | 69.52    |

3e Chiralpak AD-H column, 75/25 hexane/ *i*PrOH, 0.5 mL/min  $\lambda$  = 254 nm

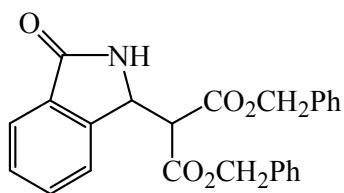

Dipartimento di Chimica

Project Name: acetoacetato

Reported by User: System

*Breeze*

### SAMPLE INFORMATION

|                   |                                 |                  |                        |
|-------------------|---------------------------------|------------------|------------------------|
| Sample Name:      | adr11,Rac.dibenz.ADH75:25a0.5ml | Acquired By:     | System                 |
| Sample Type:      | Unknown                         | Date Acquired:   | 10/21/2011 12:31:04 PM |
| Vial:             | 1                               | Acq. Method:     | 75 a 25 0 5 ml         |
| Injection #:      | 1                               | Date Processed:  | 10/21/2011 1:24:51 PM  |
| Injection Volume: | 20.00 ul                        | Channel Name:    | 2487Channel 1          |
| Run Time:         | 120.00 Minutes                  | Sample Set Name: |                        |

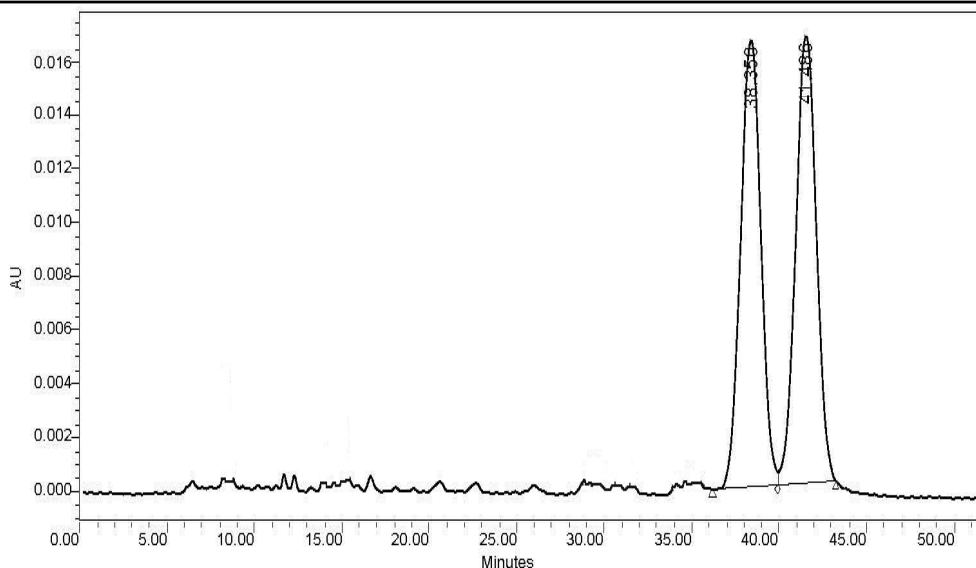

|   | RT (min) | Area (AU*sec) | % Area | Height (AU) | % Height |
|---|----------|---------------|--------|-------------|----------|
| 1 | 38.350   | 1352853       | 49.60  | 16692       | 49.99    |
| 2 | 41.486   | 1374793       | 50.40  | 16697       | 50.01    |

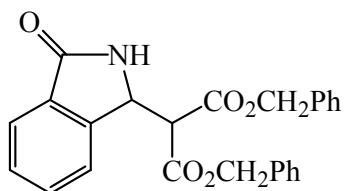

Dipartimento di Chimica

Project Name: acetoacetato

Reported by User: System

Breeze

SAMPLE INFORMATION

|                   |                                |                  |                        |
|-------------------|--------------------------------|------------------|------------------------|
| Sample Name:      | ant243cry.fil2ADH75:25 a 0.5mL | Acquired By:     | System                 |
| Sample Type:      | Unknown                        | Date Acquired:   | 10/27/2011 11:03:34 AM |
| Vial:             | 1                              | Acq. Method:     | 75 a 25 0 5 ml         |
| Injection #:      | 1                              | Date Processed:  | 10/27/2011 12:04:23 PM |
| Injection Volume: | 20.00 ul                       | Channel Name:    | 2487Channel 1          |
| Run Time:         | 120.00 Minutes                 | Sample Set Name: |                        |

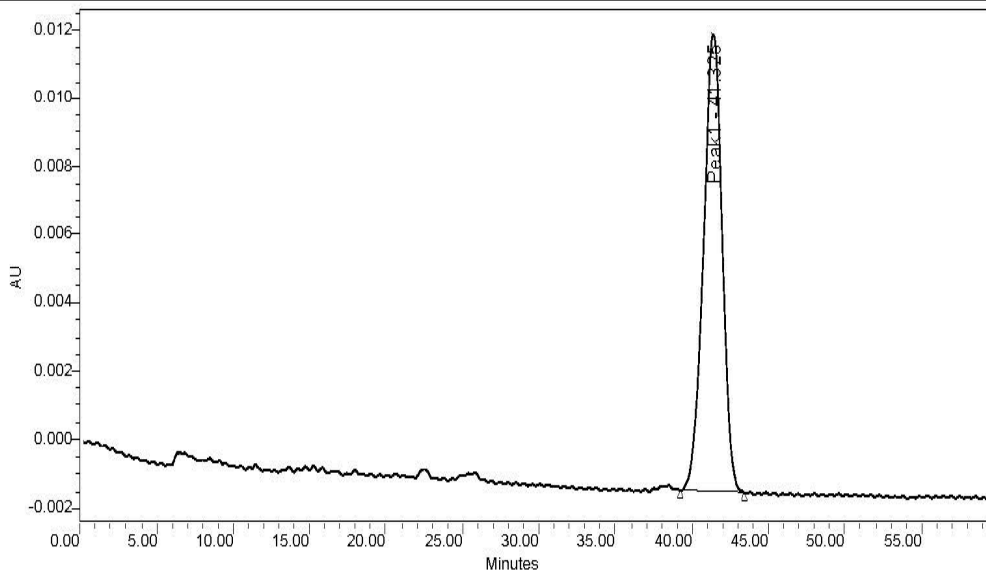

| Peak Name | RT (min) | Area (V*sec) | % Area | Height (V) | % Height |
|-----------|----------|--------------|--------|------------|----------|
| 1 Peak1   | 41.325   | 1143757      | 100.00 | 13415      | 100.00   |



**3f:** HPLC: Chiralpack AD-H, Pentane:*i*-PrOH 70:30, F = 1.0 mL/min,  $\lambda$  = 230 nm,  $t_R$  = 7.9 min,  $t_R$  major = 9.8 min.

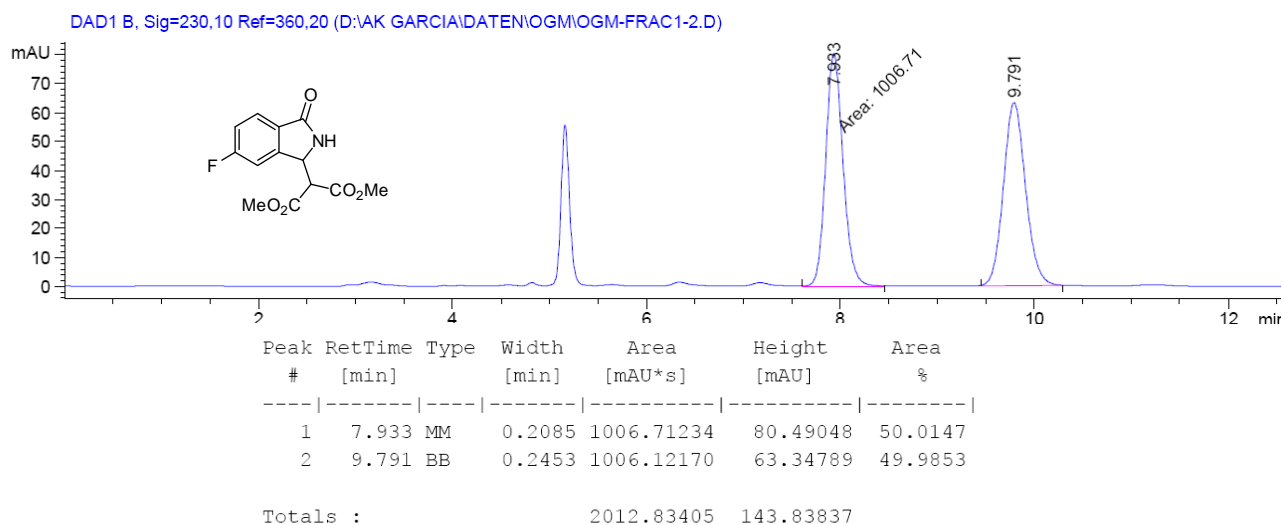

Reaction with catalyst **4**. Single recrystallization from DCM/Pentane.

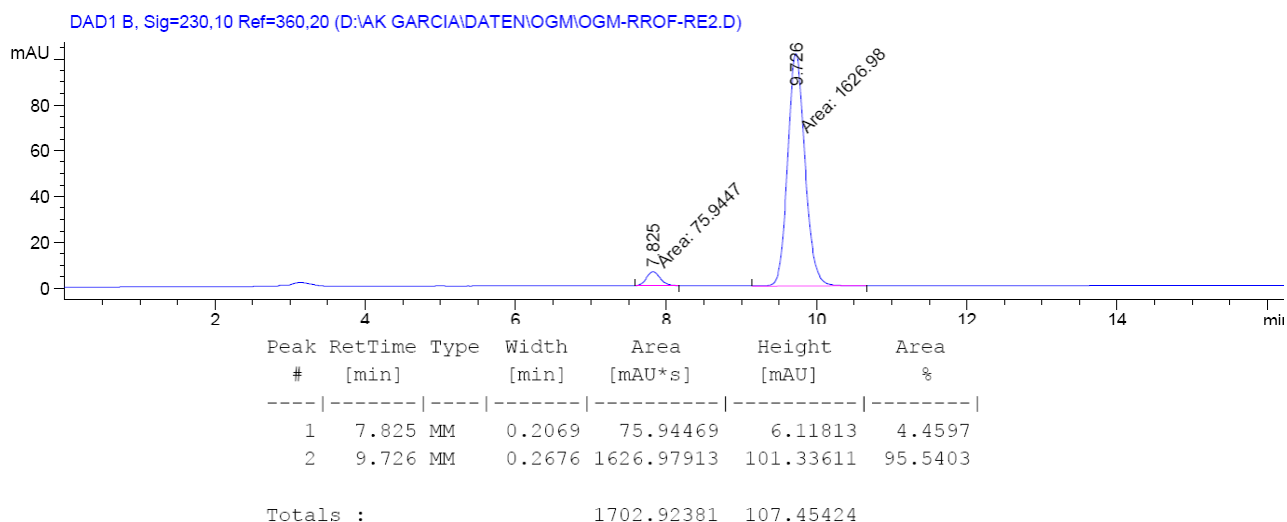

Reaction with catalyst **5**. Single recrystallization from DCM/Pentane.

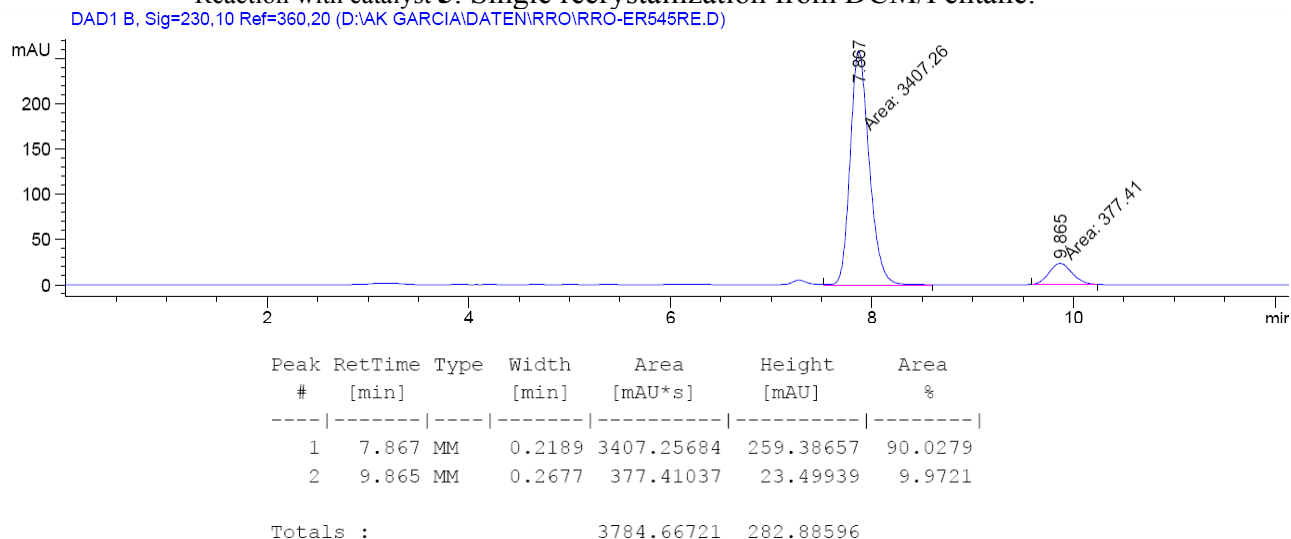

**3g**: HPLC: Chiralpack AD-H, Pentane:*i*-PrOH 70:30, F = 1.0 mL/min,  $\lambda$  = 230 nm,  $t_R$  = 11.3 min,  $t_R$  = 12.7 min.

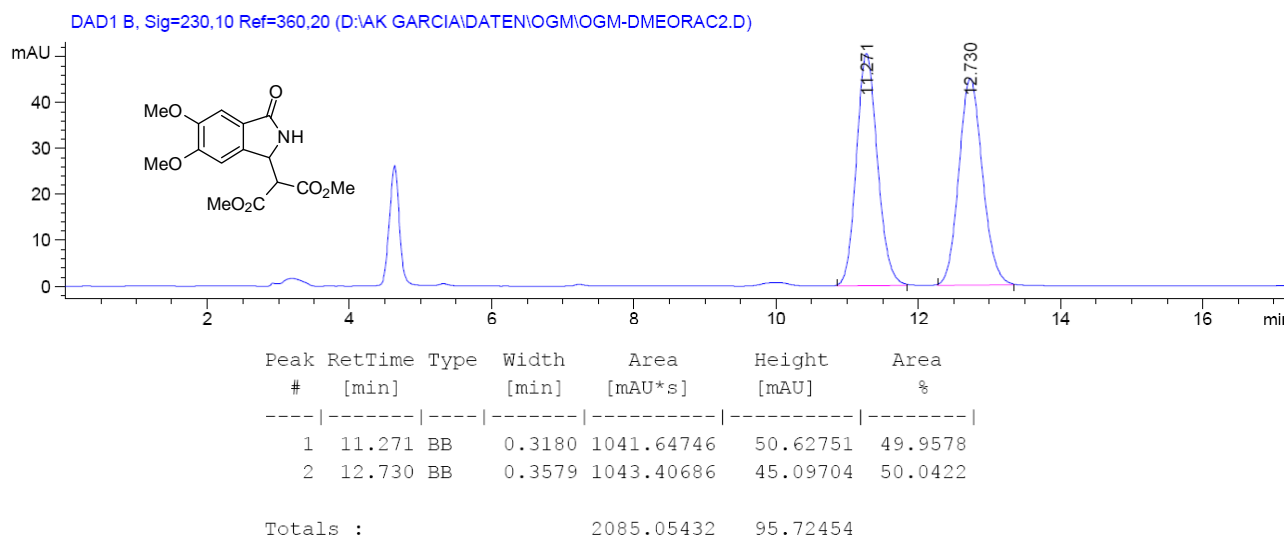

Reaction with catalyst **4**. Single recrystallization from DCM/Pentane.

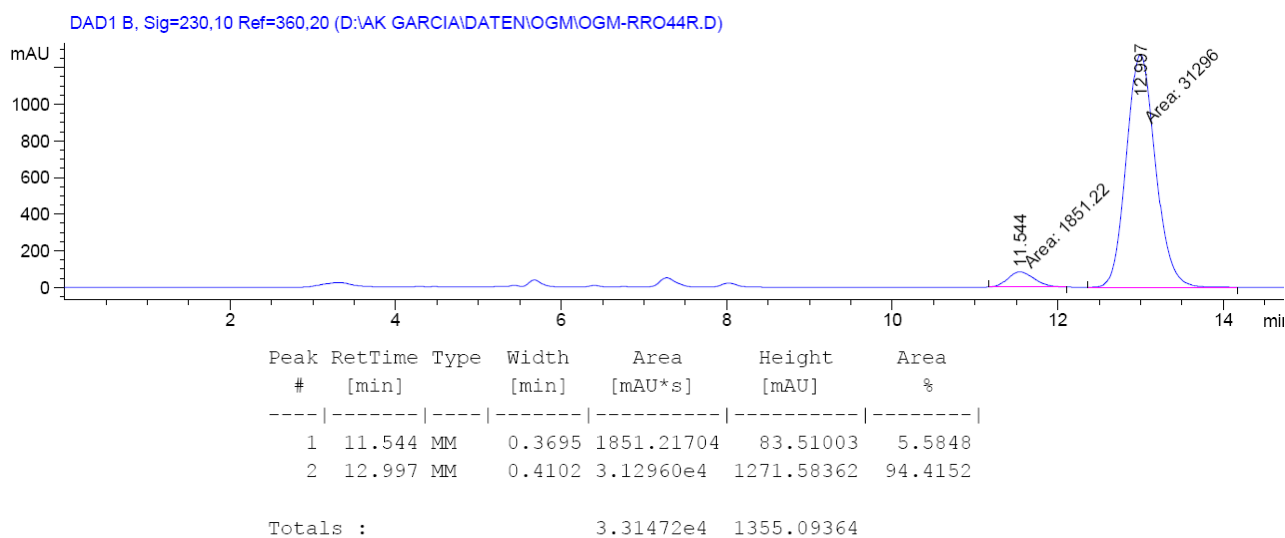

**3h:** HPLC: Chiralpack AD-H, Pentane:*i*-PrOH 60:40, F = 0.9 mL/min,  $\lambda$  = 230 nm,  $t_R$  = 10.7 min,  $t_R$  = 30.1 min.

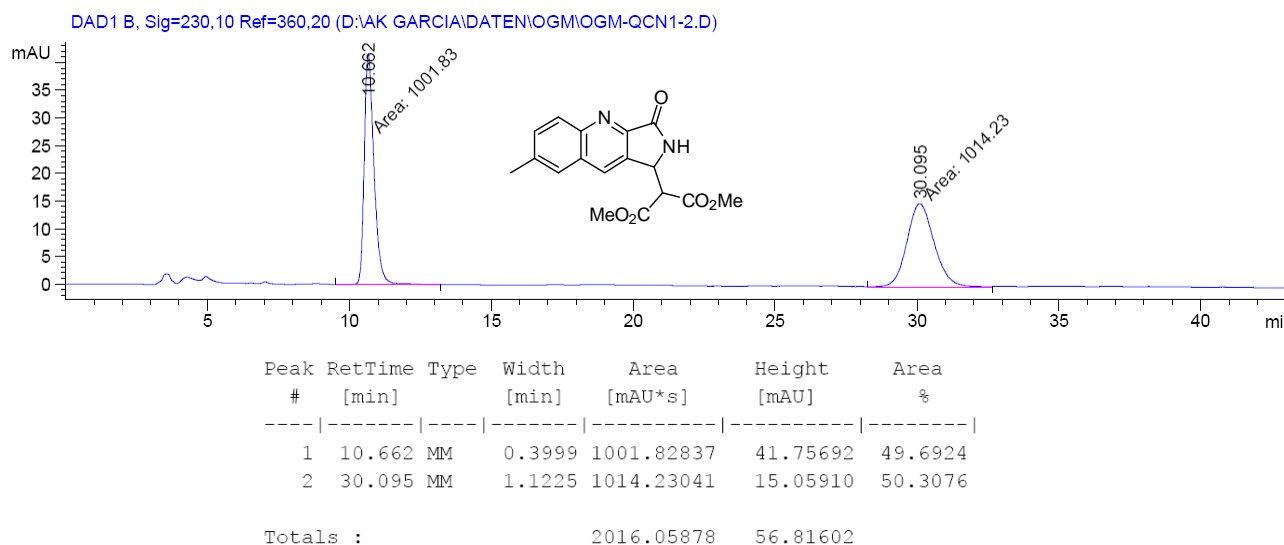

Reaction with catalyst **4**. Single recrystallization from MeCN/MeOH/DCM.

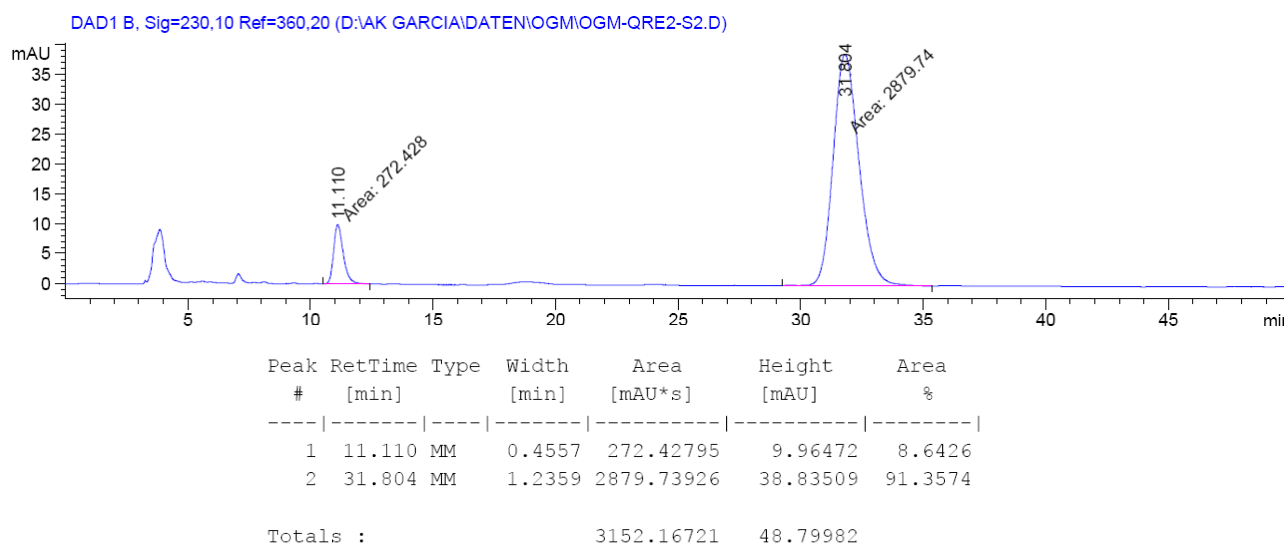

3i Chiralpack AD-H, Pentane:*i*-PrOH 95:5, F = 0.8 mL/min,  $\lambda$  = 230 nm,

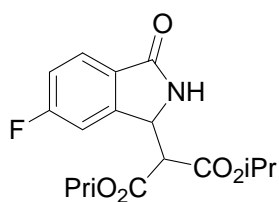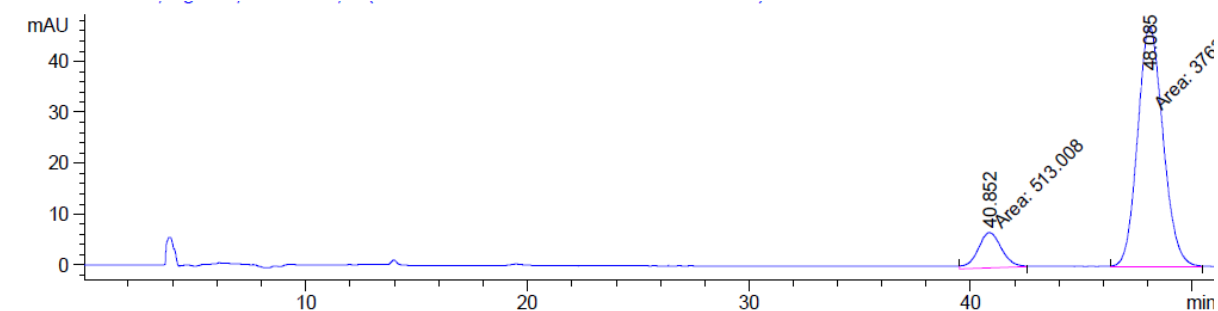

| Peak # | RetTime [min] | Type | Width [min] | Area [mAU*s] | Height [mAU] | Area %  |
|--------|---------------|------|-------------|--------------|--------------|---------|
| 1      | 40.852        | MM   | 1.2401      | 513.00806    | 6.89451      | 11.9947 |
| 2      | 48.085        | MM   | 1.3274      | 3763.94824   | 47.25934     | 88.0053 |

Totals : 4276.95630 54.15385

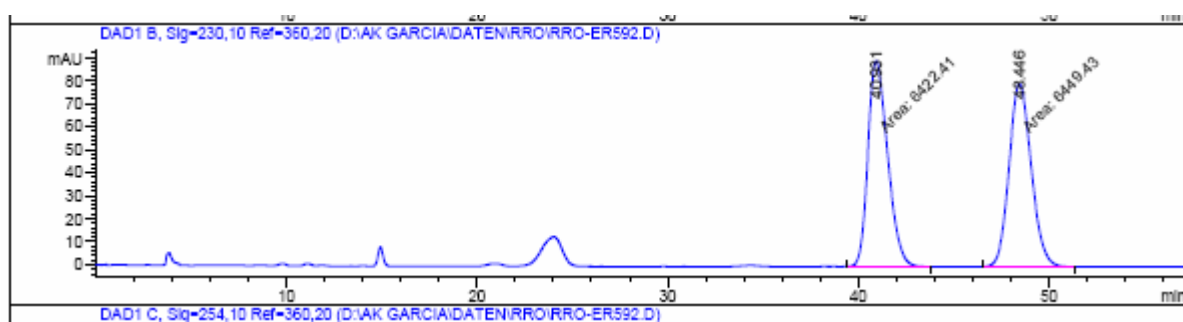

Signal 2: DAD1 B, Sig=230,10 Ref=360,20

| Peak # | RetTime [min] | Type | Width [min] | Area [mAU*s] | Height [mAU] | Area %  |
|--------|---------------|------|-------------|--------------|--------------|---------|
| 1      | 40.931        | MM   | 1.1989      | 6422.41406   | 89.28525     | 49.8951 |
| 2      | 48.446        | MM   | 1.3532      | 6449.42969   | 79.43565     | 50.1049 |

Totals : 1.28718e4 168.72089

3j Chiralpack AD-H, Pentane:*i*-PrOH 90:10, F = 1.0 mL/min,

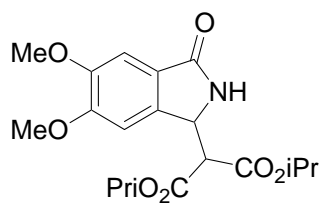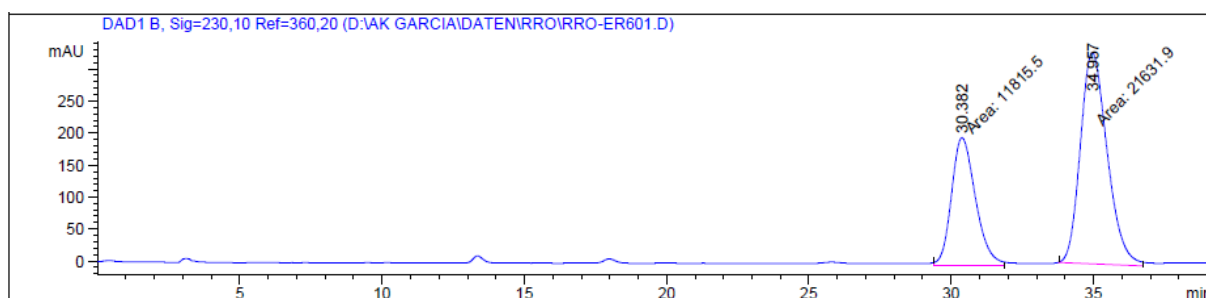

| Peak #   | RetTime [min] | Type | Width [min] | Area [mAU*s] | Height [mAU] | Area %  |
|----------|---------------|------|-------------|--------------|--------------|---------|
| 1        | 30.382        | MM   | 0.9832      | 1.18155e4    | 200.28587    | 35.3256 |
| 2        | 34.957        | MM   | 1.0919      | 2.16319e4    | 330.18002    | 64.6744 |
| Totals : |               |      |             | 3.34473e4    | 530.46590    |         |

3k Chiralpak AD-H, Pentane:*i*-PrOH 80:20, F = 1.0 mL/min,  $\lambda$  = 230 nm

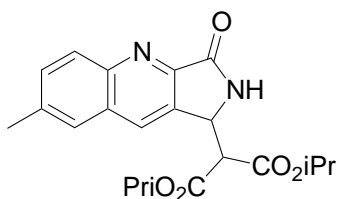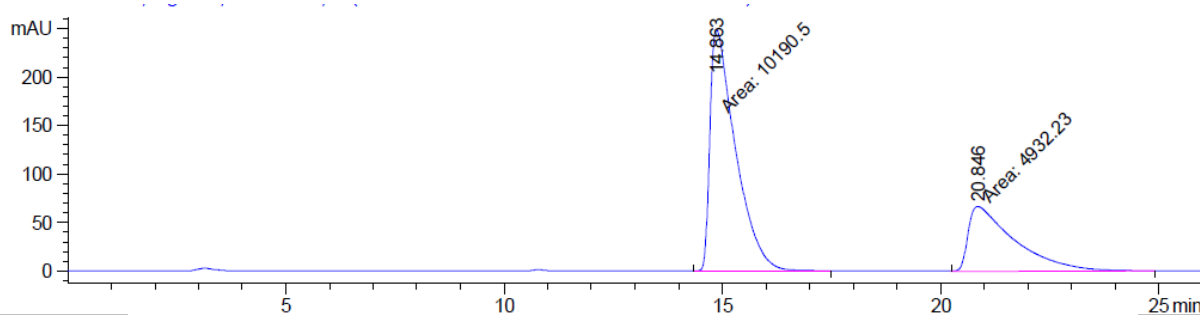

Signal 2: DAD1 B, Sig=230,10 Ref=360,20

| Peak # | RetTime [min] | Type | Width [min] | Area [mAU*s] | Height [mAU] | Area %  |
|--------|---------------|------|-------------|--------------|--------------|---------|
| 1      | 14.863        | MM   | 0.6783      | 1.01762e4    | 250.04541    | 67.1778 |
| 2      | 20.846        | MM   | 1.2445      | 4971.94727   | 66.58568     | 32.8222 |

Totals : 1.51481e4 316.63109

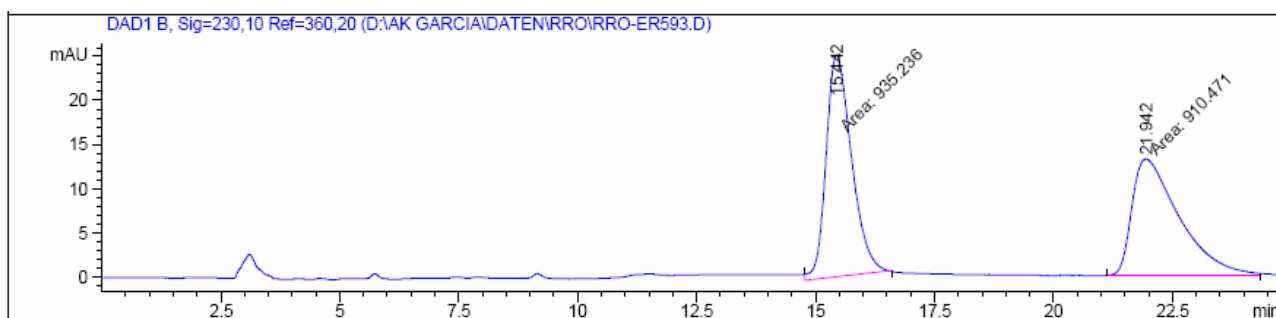

| Peak # | RetTime [min] | Type | Width [min] | Area [mAU*s] | Height [mAU] | Area %  |
|--------|---------------|------|-------------|--------------|--------------|---------|
| 1      | 15.442        | MM   | 0.6206      | 935.23596    | 25.11573     | 50.6709 |
| 2      | 21.942        | MM   | 1.1509      | 910.47150    | 13.18520     | 49.3291 |

Totals : 1845.70746 38.30093
